# Supplementary material for: N-cadherin directs the collective Schwann cell migration required for nerve regeneration through Slit2/3-mediated contact inhibition of locomotion
Source: eLife journal article supplement (doi:10.7554/elife.88872), 2024-04-03
Supplement: fig4-figsupp1-data3 [file elife-88872-fig4-figsupp1-data3-v2.zip]

Robo 4
