# Supplementary material for: N-cadherin directs the collective Schwann cell migration required for nerve regeneration through Slit2/3-mediated contact inhibition of locomotion
Source: eLife. 2024 Apr 9;13:e88872. doi: 10.7554/eLife.88872 (PMC11052573; doi:10.7554/eLife.88872)
Supplement: Figure 1—source data 1. [file elife-88872-fig1-data1.xlsx]

## Sheet: Figure 1d
Directionality Ratio
SCR	siRNA N-Cad
0.436057	0.17898
0.534751	0.0351326
0.439871	0.238848
0.641647	0.314823
0.306136	0.310679
0.52214	0.191819
0.580926	0.228821
0.140806	0.138067
0.628379	0.139468
0.574254	0.305396
0.475905	0.299158
0.488544	0.360016
0.60171	0.0971874
0.513733	0.145673
0.854082	0.259693
0.656846	0.254174
0.316302	0.477616
0.532525	0.0731691
0.523295	0.169909
0.629986	0.198583
0.522106	0.125442
0.477324	0.308678
0.460372	0.132331
0.494698	0.0933413
0.341728	0.296876
0.2422	0.376423
0.372102	0.322482
0.219897	0.300563
0.462421	0.118657
0.081326	0.335574
0.176805	0.336055
0.848425	0.352319
0.494136	0.572462
0.83763	0.318129
0.66367	0.318129
0.749452

## Sheet: Figure 1e
Velocity
SCR	siRNA N-Cad
1.22462	1.80126
1.07254	1.88671
1.15755	2.26351
1.08318	1.49824
0.65806	2.00647
1.01103	2.64359
1.38557	1.37306
1.1968	1.45667
0.942591	1.45418
0.745147	1.89856
1.16431	1.56712
0.97735	1.59264
0.726913	2.87279
1.20512	3.37924
1.45507	2.26359
1.89944	2.78417
1.90809	2.78417
1.90077	1.36611
1.7574	1.17523
1.26895	1.3365
0.688869	1.28911
0.919938	0.812557
0.691876	1.37761
0.666341	1.15214
0.890169	1.27832
0.663778	1.38914
0.616167	0.994302
0.849571	1.1481
0.570375	1.4852
0.569428	1.45475
0.711534	1.58117
0.90614	1.37192
0.781991	1.74371
0.57159	0.879615
0.610015	1.12206
0.55174
0.610015
0.55174

## Sheet: Figure 1g 
Repulsion Assay
	SCR			siRNA N-Cad 1
	repulsion	no repulsion	invasion	repulsion	no repulsion	invasion
exp 1	24	4	2	16	3	11
exp 2	24	2	4	16	0	14
exp 3	23	0	6	14	0	16
	SCR			siRNA N-Cad 2
	repulsion	no repulsion	invasion	repulsion	no repulsion	invasion
exp 1	19	7	4	11	6	13
exp 2	20	8	2	17	2	11
exp 3	20	6	4	13	5	12

## Sheet: Figure 1h
SCR		siRNA N-Cad
Free Moving	Cell:Cell Contact	Free Moving	Cell:Cell Contact
0.859	-0.963	0.853	0.853
0.165	0.068	0.149	0.05
0.668	0.03	3.648	1.715
1.994	-1.025	0.286	1.676
0.178	-0.032	1.68	2.371
0.67	-0.032	1.11	-1.35
0.676	-1.197	-0.042	0.905
1.04	-1.618	1.043	1.281
0.858	0.236	0.697	-0.349
-0.042	-1.618	0.269	1.091
2.128	-0.228	0.163	0.142
2.068	-2.154	0.589	0.36
1.052	-0.424	0.149	-0.258
0.813	-0.576	0.188	1.682
0.779	-1.827	0.26	-1.754
1.008	-0.496	0.726	-1.487
0.048	-2.591	0.426	-0.467
0.704	-0.815	1.145	3.045
0.634	-0.384	-1.488	0.724
1.414	-0.114	0.575	0.945
0.465	0.889	2.606	-0.54
0.533	-1.139	-1.308	0.866
0.573	1.515	-0.036	2.464
0.812	-0.346	1.394	-0.334
0.566	0.982	0.419	-0.463
0.517	-3.08	-1.222	2.007
1.314	-0.51	0.099	-1.342
1.442	-3.296	0.12	0.067
2.282	-4.191	0.579	1.43
0.027	-0.378	0.288	0.182
1.659	-1.595	0.776	0.264
0.349	-0.876	0.179	0.88
1.054	-2.324		2.927
0.141	-2.534	0.972	1.013
0.647	1.652	1.072	-0.416
0.336	-1.046	1.105	0.035
4.177	0.032	1.288	0.742
-0.317	0.048	0.815	-0.28
0.752	0.07	0.69	0.506
1.246	-0.539	1.513	0.746
0.075	0.028	0.578	0.326
-0.51	-2.478	0.235	0.826
1.223	-0.408	0.35	-0.396
0.895	-1.082	0.364	-0.362
0.815	-2.388	0.657	0.645
-0.179	-0.897	0.237	0.379
0.146	0.391	0.288	0.726
0.459	-3.934	0.036	-0.781
0.796	-2.06	1.654	1.507
0.578	-0.75	1.46	1.154
0.996	-0.516	0.473	1.39
0.451	0.336	-0.423	0.037
0.676	-3.125	1.356	-0.093
0.209
0
1.037
0.192
0.817
