# Supplementary material for: N-cadherin directs the collective Schwann cell migration required for nerve regeneration through Slit2/3-mediated contact inhibition of locomotion
Source: eLife. 2024 Apr 9;13:e88872. doi: 10.7554/eLife.88872 (PMC11052573; doi:10.7554/eLife.88872)
Supplement: Figure 2—source data 1. [file elife-88872-fig2-data1.xlsx]

## Sheet: Figure 2a
Repulsion Mixing Assay
	SCR/SCr			SCR response to N-cad			N-CAD response to SCR			NCAD/NCAD
	Repulsion	no repulsion	invasion	Repulsion	no repulsion	invasion	Repulsion	no repulsion	invasion	Repulsion	no repulsion	invasion
exp 1	24	2	4	9	16	5	22	1	7	16	0	14
exp 2	22	2	6	10	13	7	26	0	4	16	0	14
exp 3	22	4	4	14	15	1	19	6	5	18	3	9
exp 4	22	6	2	10	15	5	20	2	8	16	2	12

## Sheet: Figure 2d
Chamber assay
Scr:Scr	Ncad:Ncad	Scr:Ncad
44.0127	155.542	66.6903
39.0872	124.597	38.0042
56.8072	134.74	85.0521

## Sheet: Figure 2e
siRNA alpha cateinin Repulsion Assay
	SCR			siRNA alpha catenin
	repulsion	no repulsion	invasion	repulsion	no repulsion	invasion
exp1	39	1	10	38	0	12
exp2	44	0	6	40	0	10
exp3	42	0	8	41	0	9

## Sheet: Figure 2f
siRNA alpha cateinin Velocity
SCR	siRNA 1+2
0.57066	0.855204
0.929811	0.898798
0.994005	0.933239
1.39709	0.971025
0.82633	1.1182
1.23085	1.61065
0.967894	1.12085
0.81195	1.50073
0.945041	0.919752
1.60017	1.19934
1.16993	1.44357
0.701725	1.0372
0.823086	0.936682
0.960215	1.28892
0.701725	0.905712
0.823086	0.925561
0.960215	1.19721
0.754443	1.19028
0.624256	0.819728
0.938467	3.1543
0.734637	2.38569
0.966297	3.06506
1.49929	1.72201
1.24933	2.6541
1.41657	3.26543
1.75754	3.53682
1.95703	3.1543
1.52439	2.38569
1.41731	3.06506
1.50053	1.72201
1.20985	2.6541
2.51414	3.26543
0.391809	3.53682
0.61644	0.262475
0.393906	1.33479
0.647818	1.16892
0.286152	1.36605
1.05489	1.13477
0.647976	1.02305
0.722945	0.85689
0.336524	1.04627
0.42369	0.614199

## Sheet: Figure 2g
siRNA p120 cateinin Repulsion Assay
		Repulsion				No repulsion				Invasion
exp1	Scr	15	18	17	18	7	4	7	6	3	3	1	1
exp2	Si1	17	17	19		7	7	5		1	1	1
exp3	Si2	14	14	13	17	8	7	7	5	3	4	5	3

## Sheet: Figure 2h
siRNA p120 cateinin Velocity
SCR	si1	si2
1.1858	1.03208	0.995486
0.88569	1.40539	0.562157
0.707088	0.624375	0.710748
0.951568	0.922289	1.36879
0.607539	0.699036	1.24436
1.43467	0.995486	0.936928
1.7055	0.428205	0.900329
0.437721	0.691716	1.03208
1.23704	0.907649	1.22972
0.625107	0.715872	1.14188
0.856411	0.980847	0.739295
0.739295	0.951568	0.672685
0.819812	0.797853	0.87105
0.639014	1.0394	1.17116
0.849091	0.863731	1.45663
1.28828	1.09796	0.929608
1.08332	0.819812	1.35415
0.922289	1.05404	1.00281
0.87105	0.944248	0.723923
0.88569	1.52251	0.834452
0.980847	1.06136	1.31756
1.35415	0.64853	0.722459
1.1492	0.958887	1.1858
0.690985	1.52251	1.54447
1.1126	1.26632	1.24436
0.988166	0.71148	1.32488
0.87105	1.42003	0.550445
1.47127	1.27364	0.936928
1.39075	0.669757	0.900329
1.259	1.6323	1.22972
