# Supplementary material for: N-cadherin directs the collective Schwann cell migration required for nerve regeneration through Slit2/3-mediated contact inhibition of locomotion
Source: eLife. 2024 Apr 9;13:e88872. doi: 10.7554/eLife.88872 (PMC11052573; doi:10.7554/eLife.88872)
Supplement: Figure 3—source data 1. [file elife-88872-fig3-data1.xlsx]

## Sheet: Figure 3c
Rescue Repulsion Assay
				Repulsion								No Repulsion								Overlapping
SCR	14	12	13	13	11	10	10		3	5	4	5	3	3	3		1	1	1	0	1	2	2
siRNA N-cad	11	7	9	7	6	8	6		1	2	3	3	1	1	1		6	9	6	8	8	6	8
siRNA N-cad+Intracellular	6	7	9	8					2	3	3	7					10	8	6	7
siRNA N-cad+Extracellular	14	11	11	12					2	3	3	1					2	4	4	5
siRNA N-cad+full length	9	11	10						2	1	0						4	3	5
