# Supplementary material for: N-cadherin directs the collective Schwann cell migration required for nerve regeneration through Slit2/3-mediated contact inhibition of locomotion
Source: eLife. 2024 Apr 9;13:e88872. doi: 10.7554/eLife.88872 (PMC11052573; doi:10.7554/eLife.88872)
Supplement: Figure 4—figure supplement 1—source data 1. [file elife-88872-fig4-figsupp1-data1.xlsx]

## Sheet: Figure 4-Supplement 1a
EphB2 KD repulsion Assay
		Repulsion			No Repulsion			Overlapping
SCR	7	6	6	0	2	4	3	2	0
siRNA EphB2 1	7	8	7	2	1	3	1	1	0

## Sheet: Figure 4-Supplment 1c
siRNA Glypican-4 Velocity
SCR	si2	si3
0.901276	0.908209	1.03993
1.00527	1.0746	1.20632
0.580976	0.647532	0.769551
0.818081	1.03993	1.29645
0.956739	0.741819	0.783417
1.68469	0.783417	1.18552
1.40738	0.413894	0.610094
0.852745	0.873544	0.852745
1.23405	0.859678	1.0122
1.10233	0.741819	0.68289
0.88741	0.595535	1.71936
0.963672	0.880477	0.762618
0.894343	0.673877	1.02607
1.04687	0.56711	1.06767
0.741819	0.956739	0.554631
0.852745	0.57751	1.08846
1.19246	1.25485	0.894343
0.845813	0.894343	0.831947
1.95507	0.908209	0.410427
1.14393	0.859678	0.866611
0.804215	0.998336	1.28952
0.748752	0.852745	1.1162
0.707155	1.6015	0.6302
0.691902	0.859678	1.08846
1.14393	1.67083	0.707155
0.578203	1.19246	0.646839
0.873544	0.942873	1.0122
0.901276	1.033	0.998336
0.88741	2.20466	1.19939
1.21326	0.873544	1.63616
0.942873
0.831947
0.596229
0.755685
0.942873
0.811148
0.818081
1.06073
0.991403
1.31032
1.22019
1.71242
0.755685
0.88741
1.26872
0.845813
0.963672
1.06767
1.06767
1.53217

## Sheet: Figure 4-Supplement 1d
No. overlapping cells
siRNA N-Cad	siRNA Gpc4	siRNA N-Cad + Gpc4
7	0	1
10	0	1
12	0	2
12	1	5
12	0	1
11	4	2
5	1	23
5	1	15
5	1	9
3	2	12
6	1	11
8	1	14
20	3	12
19	2	20
17	0	21
10	10	11
15	8	17
	4	13
		16

## Sheet: Figure 4-supplement 1h
Robo1 KD ct values
	B2M					Robo1
	Exp 1	Exp 2	Exp 3				Exp 1	Exp 2	Exp 3
Scr	18.2248	16.0261	16.2866			Scr	24.134	22.9882	23.386
Robo 1 siRNA1	16.6834	16.1389	16.1152			Robo 1 siRNA1	24.6559	24.0633	24.2459
Robo 1 siRNA2	16.6987	15.6175	16.3584			Robo 1 siRNA2	24.147	23.5605	24.3966
Robo2 KD ct values
	B2M					Robo2
	Exp 1	Exp 2	Exp 3	Exp 4			Exp 1	Exp 2	Exp 3	Exp 4
Scr	21.1932	21.1452	17.1699	17.206		Scr	32.3732	34.194	25.9669	26.9853
Robo 2 siRNA1	19.2021	22.6625	17.1635			Robo 2 siRNA1	33.0338	36.8541	27.7278
Robo 2 siRNA2	20.5128		16.9178	18.7171		Robo 2 siRNA2	34.0975		27.571	30.5129

## Sheet: Figure 4-Supplement 1i
Cell roundness
	Sox2	Slit2/3 siRNA 1	Slit2/3 siRNA 2
Exp 1	0.3914	0.425465	0.502275
Exp 2	0.38234	0.452966	0.471325
Exp 3	0.382006	0.458529	0.411197
