# Supplementary material for: N-cadherin directs the collective Schwann cell migration required for nerve regeneration through Slit2/3-mediated contact inhibition of locomotion
Source: eLife. 2024 Apr 9;13:e88872. doi: 10.7554/eLife.88872 (PMC11052573; doi:10.7554/eLife.88872)
Supplement: Figure 4—source data 1. [file elife-88872-fig4-data1.xlsx]

## Sheet: Figure 4a
siRNA Glypican-4 repulsion Assay
		Repulsion			No Repulsion			Overlapping
SCR	19	20	18	8	7	9	3	3	3
siRNA Glypican-4 1	13	13	18	17	16	13	0	1	1
siRNA Glypican-4 2	8	10	5	21	18	20	1	2	1

## Sheet: Figure 4c
siRNA Glypican-4 Cluster Assay
	1			2			3			>4
SCR	21	39	28	14	12	16	15	3	6	4	0	0
siRNA Glypican-4 1	25	18	25	14	20	8	6	12	9	9	4	13
siRNA Glypican-4 2	19	16	12	7	8	1	8	4	2	4	4	9

## Sheet: Figure 4d
siRNA Slit2/3 Repulsion assay
		Repulsion			No Repulsion			Overlapping
SCR	21	19	17	5	9	12	4	2	1
siRNA slit2/3 1	13	8	13	15	22	16	2	0	1

## Sheet: Figure 4f
siRNA Slit2/3 Cluster Assay
	1			2			3			4-6
SCR	152	158	97	32	36	53	12	6	27	4	0	23
SiRNA Slit2/Slit3 1	115	117	73	42	38	48	24	30	40	19	15	37
SiRNA Slit2/Slit3 2	48	27	29	20	8	18	12	9	3	47	43	5

## Sheet: Figure 4h
siRNA Robo 1/2 Cluster Assay
	1			2			3			>4
Control	51	70	40	11	7	18	18	18	13	7	7	0
Robo 1 siRNA1	2	1	1	45	53	54	59	45	55	48	38	37
Robo 1 siRNA2	1	1	0	50	49	54	62	84	55	33	7	21
Robo 2 siRNA1	28	24	18	13	14	38	12	42	14	37	19	40
Robo 2 siRNA2	17	28	19	56	16	22	0	0	37	0	0	20
