# Supplementary material for: N-cadherin directs the collective Schwann cell migration required for nerve regeneration through Slit2/3-mediated contact inhibition of locomotion
Source: eLife. 2024 Apr 9;13:e88872. doi: 10.7554/eLife.88872 (PMC11052573; doi:10.7554/eLife.88872)
Supplement: Figure 5—source data 1. [file elife-88872-fig5-data1.xlsx]

## Sheet: Figure 5b
Slit2 intensity protrusions
Control	siRNA N-cad
1.84845	0.348648
0.599397	0.472621
0.655389	0.75357
1.89091	0.369043
0.805025	0.621186
0.971673	0.360081
0.407698	0.605124
1.24185	0.522231
1.77491	0.431153
1.24804	0.680627
0.0786575	0.540298
0.478002	0.590608
0.946307	0.883965
0.953722	0.617956
0.869835	0.486447
1.53784	0.224451
0.574449	0.611056
1.92851	0.331116
0.568916	0.414585
0.595233	0.34419
0.925126	0.684462
0.807858	0.336205
1.44588	0.431391
2.17656	0.6111
1.21828	0.5594
0.758566	1.1087
1.47104	0.992594
1.15503	0.454786
0.783566	0.234992
1.04172	0.460155
0.78132	0.237138
1.06818	0.16039
0.62772	0.663836
0.553825	0.243548
0.570454	0.794715
0.728306	0.753741
0.79975	0.116985
0.74772	0.150776
1.08724	0.255932
0.790742	0.489626
1.16767	0.557086
0.758668	0.700018
0.805984	0.35251
1.15645	0.634062
0.49976	0.342989
0.408832	0.221281
0.747919	0.392239
1.51324	0.370908
1.21627	0.976004
0.956732	0.482756
0.747371	0.360527
0.709219	0.422056
0.833898	0.0810213
1.77261	0.489469
1.99451	0.297037
0.89881	0.370237
0.938408	0.336826
0.746644	0.38812
0.630964	0.416284
0.553701	0.258389
1.23445	0.384462
0.828253	0.480589
0.453018	0.282579
1.33836	0.119541
0.278961	0.526257
0.987878	0.767963
0.660896	0.382202
1.78458	0.552196
1.07098	0.461803
0.991995	1.04033
0.883328	0.457833
0.936802	1.09321
1.68213	0.532225
2.10118	0.494941
0.408161	0.441984
1.086	0.54992
0.704191	0.974611
0.365399	0.798937
0.566913	0.794007
0.882701	0.245934
0.751045	0.353199
0.499112	0.475774
1.69623	0.554611
0.956426	0.597252
0.534919
0.533683
1.32071
1.02657

## Sheet: Figure 5d
Slit3 intensity protrusions
Control	siRNA N-cad
1.0613	0.906237
1.71659	0.816427
1.28237	0.610275
1.53613	0.123309
0.447484	0.230583
1.64466	0.590352
1.97931	0.14477
0.310111	0.0773963
1.00615	0.100333
0.0260238	0.656775
1.27546	0.12814
0.471501	0.389908
0.388497	0.348124
0.257205	0.220547
0.161147	1.21626
0.111001	1.11893
0.382773	1.031
1.05256	0.741396
0.34811	0.643751
1.89411	0.559347
0.308998	0.712741
1.28959	0.523784
0.34255	0.391598
0.62868	0.253247
0.887154	0.334968
0.664539	0.170576
0.516259	0.586467
0.236388	0.324018
2.96677	0.508301
0.660827	0.102191
2.34294	0.739725
0.166046	0.446556
1.77218	0.281142
1.63031	0.640131
1.02231	0.65707
1.02196	0.367611
0.525594	0.646473
0.838439	0.798653
0.276631	0.328332
0.778567	0.541259
0.497065	0.865943
1.1751	0.558996
2.99049	0.909463
0.738278	1.05353
0.744827	0.226193
0.949146	0.79336
0.819721	1.01291
1.1232	0.135728
0.827297	0.245807
1.4633	0.511663
0.504731	0.465558
1.09328	0.199333
0.835811	0.325847
1.57979	0.065682
1.22399	0.312708
0.317333	0.273264
0.620497	0.290683
0.567491	0.135167
0.50103	0.100411
0.231162	0.232301
1.10675	0.10573
1.3987	0.380123
2.24841	0.269832
1.17174	0.446177
1.53406	0.380766
0.479922	0.554944
1.17064	0.386183
0.559627	0.408695
0.784331	0.414665
0.947603	0.397154
1.73948	0.281861
0.994969	0.4663
0.653505	0.450917
0.526901	0.190575
1.65515	0.376066
1.12895	0.393712
1.27207	0.588369
0.413591	0.119963
0.363498	0.564633
1.05335	0.314159
0.804304	0.266038
1.69145	0.223772
1.22563	0.516049
0.773632	0.415047
1.42601	0.493757
0.985761	0.250729
0.941935	0.416221
0.911584	0.527476
0.776121
1.21489
1.65948
1.87785
0.642773
2.12243
0.655114
0.967279
0.329674
0.239088
0.920745
1.13528
0.63698

## Sheet: Figure 5f
Slit2 intensity protrusions Rescue
SCR	CV	ECD
2.20982	0.374538	1.90272
0.701822	0.128844	0.846803
0.870957	0.249325	0.907139
1.42928	1.14423	0.715082
1.48418	0.23615	0.255914
2.56025	0.176761	0.655267
1.111	0.3538	0.478263
1.01208	1.28167	0.280119
0.456046	0.958812	0.226889
0.277465	0.00433903	0.24458
0.547803	0.325282	0.471469
0.720714	0.508365	0.783047
0.552106	0.108269	1.43428
0.127086	0.72539	0.598307
0.0723657	0.42415	1.20563
0.158619	0.830873	0.683725
1.52046	1.27657	0.948779
1.11155	0.651922	0.719294
1.61748	1.12095	1.09374
1.45893	0.799366	1.29768
0.589726	0.981626	0.654253
1.14069	0.511969	0.279988
0.797408	0.304047	1.50039
0.11495	0.394324	0.959547
0.510541	0.302922	0.898324
1.15912	0.457533	0.279107
0.876903	0.0613204	0.656707
0.615783	0.201711	0.48957
0.871028	0.677759	0.505953
0.156778	0.0837803	1.05053
1.60326	0.709008	0.537526
1.51278	0.726793	1.48751
1.0998	0.357531	0.868006
0.599225	0.707154	0.739738
1.24586	0.554084	1.25809
1.03314	0.510499	0.671677
1.08584	0.347351	1.60385
1.31009	0.150052	0.579215
0.812523	0.308148	2.17423
1.13501	0.139376	0.354508
0.457169	1.32278	0.79109
1.55395	0.677456	1.7075
0.581903	0.983548	0.800785
1.58401	1.62309	0.327193
0.968889	0.190836	0.521517
0.76815	0.315195	0.768957
0.783181	0.797094	0.620457
1.34906	0.876073	0.495736
2.09854	0.155247	1.70822
1.98394	0.194991	0.484194
0.752207	0.0736484	0.99544
0.270375	0.268944	0.894375
0.289704	0.21573	1.54993
0.175949	0.353007	1.64407
0.234994	0.895092	0.634806
0.772103		2.87802
0.454805		1.71356
2.4312		0.865356
1.55384		1.52013
0.924239		0.619968
0.956688		1.49591
0.791093		1.38453
1.35839		0.297376
0.916753		0.926704
		2.00587

## Sheet: Figure 5h
Slit3 intensity protrusions Rescue
SCR	CV	ECD
0.583326	0.422858	0.593374
0.45154	0.246844	0.641915
1.19034	0.273171	0.339078
0.393438	0.402365	1.1178
1.04683	0.287704	2.5945
1.25181	0.655593	1.20547
0.49308	0.344297	0.927502
0.869229	0.270183	1.09446
1.57385	0.186968	0.690476
1.27634	0.266553	0.202881
1.95059	1.05217	0.608484
0.360556	0.860294	1.79182
0.750313	0.562692	0.763019
1.0748	0.435388	0.450311
0.365207	0.448128	0.168174
0.491926	0.207981	0.691731
1.68075	1.30099	0.473281
2.35655	0.299248	1.37841
1.22015	0.455832	0.702676
0.619373	0.805898	0.697989
0.617628	1.0061	1.13969
1.69543	0.516157	1.10324
1.10143	0.565097	0.656627
0.916106	0.847398	1.63963
0.752933	0.988842	1.12131
0.776528	0.594893	1.45118
1.50515	0.431427	0.837351
0.2704	0.53132	1.28236
1.46088	0.361464	0.628803
0.553965	0.273125	1.28336
0.430075	0.376187	1.22272
0.626415	0.26298	0.399541
0.541286	0.180492	0.346509
0.881408	0.79907	1.42253
0.588869	1.13359	1.01049
0.914984	0.672624	1.17836
2.49231	0.788973	1.06811
2.14657	0.959399	1.29103
0.727641	0.671931	0.275921
0.678366	0.724475	0.45904
1.17645	0.467288	0.62957
0.948753	1.08714	0.341775
0.268306	0.871638	0.238516
0.861985	1.07663	0.54164
0.534227	0.157493	0.632851
1.54116	0.735749	0.528654
0.980804	0.665632	0.541944
0.603312	0.780685	0.758787
0.806845	0.703127	0.394523
0.791433	0.347276	1.43785
1.33476	0.79424	1.17487
0.643541	0.680089	0.633969
1.07818	0.746442	0.824827
1.54233	0.795044	0.833316
0.503699	0.656389	0.570866
0.802627	0.929196	0.367747
0.623162	1.35244	2.24093
0.999348	1.865	0.382711
1.34447	0.572499	0.687242
1.44372	1.19756	1.55154
0.816676	0.0623608	0.335625
0.977865	0.0751047	0.675498
1.34271	0.120175	0.960733
0.8179	0.0872211
1.03233	0.0872211
2.05995	1.18548
0.788082	1.65683
1.70868	0.347438
1.337
0.611324
