# Supplementary material for: N-cadherin directs the collective Schwann cell migration required for nerve regeneration through Slit2/3-mediated contact inhibition of locomotion
Source: eLife. 2024 Apr 9;13:e88872. doi: 10.7554/eLife.88872 (PMC11052573; doi:10.7554/eLife.88872)
Supplement: Figure 6—figure supplement 1—source data 1. [file elife-88872-fig6-figsupp1-data1.xlsx]

## Sheet: Figure 6-Supplement 1e
Roundness cluster rSlit2
PBS	rSlit2
0.29	0.659
0.404	0.721
0.458	0.561
0.516	0.648
0.237	0.61
0.326	0.763
0.514	0.552
0.363	0.789
0.548	0.815
0.64	0.568
0.376	0.426
0.405	0.572
0.797	0.71
0.523	0.525
0.532	0.581
0.792	0.65
0.522	0.642
0.654	0.557
0.564	0.613
0.621	0.682
0.47	0.682
0.385	0.731
0.372	0.55
0.529	0.739
	0.514
	0.632
	0.635
	0.791
	0.714
	0.483
	0.439

## Sheet: Figure 6-Supplement 1f
Roundness cluster Slit23 KD
Control	siRNA Slit2/3 1	siRNA Slit2/3 2
0.43	0.535	0.661
0.587	0.407	0.596
0.388	0.605	0.79
0.625	0.614	0.549
0.774	0.46	0.78
0.64	0.715	0.723
0.628	0.546	0.618
0.33	0.429	0.663
0.374	0.452	0.779
0.4	0.695	0.741
0.319	0.432	0.561
0.527	0.637	0.624
0.286	0.642	0.362
0.719	0.565	0.58
0.522	0.733	0.696
0.454	0.563	0.505
0.454	0.826	0.516
0.355	0.642	0.646
0.219	0.911	0.784
	0.869

## Sheet: Figure 6-supplement 1g
Nuclear Alignment
SOX2 SCR	siRNA Slit2/3 1	SiRNA Slit2/3 2
294.031	335.708	340.253
88.55	327.344	336.232
68.293	320.615	321.965
68.293	312.064	317.644
56.984	310.948	312.408
47.82	310.193	305.268
46.698	303.314	286.894
42.795	296.519	285.726
42.773	296.189	279.343
40.854	289.577	278.973
34.694	288.332	275.977
34.654	285.972	271.825
34.654	281.866	271.123
33.12	280.668	86.248
30.659	279.752	80.301
27.092	278.699	79.833
26.232	278.616	77.551
24.58	272.8	73.059
22.858	85.677	68.825
19.708	85.381	68.722
16.779	77.471	67.996
15	71.602	66.403
13.757	64.299	56.888
13.152	63.225	48.012
11.987	62.313	44.927
9.316	61.398	41.3
8.446	60.211	41.206
7.565	55.559	30.903
3.992	51.657	29.628
1.348	50.947	29.333
0.093	49.633	26.356
0	48.368	23.791
0	45.559	21.57
0	41.829	15.706
0	41.104	15.537
0	39.371	9.353
0	38.405	8.131
0	34.517	6.757
0	29.781	4.41
-0.406	27.15	3.721
-0.671	26.831	0
-0.808	26.15	0
-1.731	22.33	0
-2.553	19.654	0
-3.129	13.031	0
-4.173	12.677	0
-4.254	11.31	-0.574
-7.458	11.016	-0.841
-7.458	10.719	-1.044
-7.516	9.2	-3.721
-7.722	8.67	-7.021
-8.794	8.584	-11.052
-11.557	7.576	-12
-18.357	7.189	-12.286
-18.357	6.641	-12.458
-18.669	4.838	-14.465
-20.956	3.859	-18.186
-21.492	2.873	-29.147
-21.607	1.302	-31.962
-25.773	0	-38.754
-27.17	-21.145	-42.284
-45.056	-23.554	-46.005
-46.391	-23.768	-47.168
-49.506	-41.221	-53.119
-54.673	-51.097	-65.545
-56.574	-73.72	-69.266
-68.251	-78.957	-71.889
-70.248	-83.282	-75.61
-78.314	-84.841	-79.815
-81.836	-90.489	-83.536
-81.836	-92.139	-97.042
-84.214	-93.621
-130.369	-107.592
	-111.219
	-114.717
	-117.281
	-130.627
	-137.337
