# Supplementary material for: N-cadherin directs the collective Schwann cell migration required for nerve regeneration through Slit2/3-mediated contact inhibition of locomotion
Source: eLife. 2024 Apr 9;13:e88872. doi: 10.7554/eLife.88872 (PMC11052573; doi:10.7554/eLife.88872)
Supplement: Figure 6—source data 1. [file elife-88872-fig6-data1.xlsx]

## Sheet: Figure 6a
siRNA Slit2/3 Collective Migration
Exp 1	Scr	siRNA Slit2/3
	0.959624	0.509605
	1.00722	0.651356
	0.98549	0.92746
	0.713852	0.623414
	1.18112	0.307189
	1.2241	0.537896
	0.59657	0.822708
	1.32858	0.905154
Exp 2	Scr	siRNA Slit2/3
	0.85554	0.39216
	0.772491	0.555113
	1.07426	0.624549
	0.708389	0.465804
	0.805874	1.05275
	1.15939	0.763911
	1.38003	0.564419
	1.30178	0.792141
	1.00722	0.651356
Exp 3	Scr	siRNA Slit2/3
	0.495486	1.14206
	0.845094	1.023
	1.25871	1.39771
	0.968282	0.981457
	1.29264	1.13808
	1.2959	0.816896
	0.864206	0.248773
	0.863592	0.671709
		0.429846

## Sheet: Figure 6c
rSlit2 Cluster Assay
		1			2			3			>4
PBS	107	123	86	42	34	23	4	4	21	0	0	0
rSlit2	95	47	81	86	35	58	47	19	24	48	32	24

## Sheet: Figure 6d
rSlit2 Collective Migration
	PBS	rSlit2
Exp 1	0.828258	0.512118
Exp 2	1.55229	0.911368
Exp 3	0.856305	0.676161
Exp 3	0.763151	0.41912

## Sheet: Figure 6e
rSlit2 Elucidean Distance
PBS	rSlit2
308.235	245.392
317.8	176.233
186.389	344.076
286	55.4617
92.0869	184.954
83.2166	279.407
386.174	230.556
230.512	92.0869
120.615	172.029
289.152	247.952
187.489	317.473
278.352	305.944
402.767	249.289
393.429	246.018
286.531	194.928
384.038	152.778
459.048	169.189
205.222	284.016
303.936	197.284
232.665	475.395
297.069	136
253.513	121.852
307.002	183.142
307.176	56.4358
135.484	158.354
200.96	161.929
281.469	75.1066
174.184	256.603
226.108	153.31
243.822	85.703
280.045	186.639
249.576	213.841
297.067	137.768
197.942	60.4401
83.6301	279.644
217.846	173.416
203.214	128.062
211.698	154.457
84.7231	187.843
62.2977	37.7359
66.5733	197.841
211.896	132.136
219.545	90.7359
181.019	10
303.209	181.574
178.213	27.8568
202.608	98.8433
241.479	247.097
231.866	28.6531
357.693	119.52
366.24	43.2897
184.296	265.121
168.76	62.514
143.781	119.683
63.9531	121.622
437.639	68.7968
280.494	177.792
236.373	407.521
58.4637	145.248
348.006	282.889
137.364	295.845
110.454	159.703
235.595	183.6
297.136	173.104
370.864	173.28
97.0155	137.058
294.635	197.223
341.686	161.697
362.945	141.032
353.276	180.801
404.534	179.179
114.739	64.405
361.05	218.332
390.233	220.554
250.511	119.281
220.168	178.941
148.946	17.088
278.729	222.423
238.193	85.7088
149.255	155.541
538.436	36.8782
210.069	93.4077
449.964	246.219
141.223	214.756
167.836	117.652
276.973	94.3663
171.712	294.727
328.347	359.469
113.004	81.3941
395.885	257.701
328.27	182.439
286.196	125.256
451.108	114.022
114.978	131.183
400.405	104.652
395.942	284.318
316.938	165.469
276.134	88.0057
342.3	124.579
184.835	219.456
351.07	80.7775
79.3095	112.73
118.106	130.981
322.318	153.056
334.522	90.2497
301.159	124.004
463.672	86.539
283.27	164.694
465.672	131.244
115.07	218.387
350.179	218.634
107.331	174.141
420.52	199.7
287.367	181.516
368.978	198.172
244.663	163.218
297.741	327.471
209.848	203.246
432.14	238.034
117.068	95.0053
192.065	93.0054
147.027	210.238
132.981	149.773
379.012	156.719
172.351	63.6003
308.224	408.573
270.17	273.651
196.657	286.356
470.523	328.221
93.0591	339.65
453.184	242.671
411.3	21
343.188	206.022
430.256	314.407
469.32	329.815
60.208	372.828
343.922	249.191
323.608	123.458
336.387
68.6804
64.9384

## Sheet: Figure 6h
Sox2 rSlit2 Cell Roundnesss
PBS	rSlit2
0.233311	0.310003
0.235496	0.301822
0.296841	0.458819

## Sheet: Figure 6i
Nuclear Alignment to Cluster
PBS	rSlit2
111.007	0
111.007	0
110.641	0
110.641	0
101.104	0.289
101.104	0.451
98.23	0.451
98.23	0.745
95.368	1.621
95.368	3.656
91.521	3.656
91.521	3.75
90.736	3.75
90.736	3.899
74.248	4.348
74.248	4.398
68.968	4.398
59.827	5.38
59.114	5.7
59.114	7.456
51.961	7.948
51.961	8.631
48.8	8.631
48.8	11.095
43.756	11.095
43.756	11.852
42.746	12.893
41.081	13.959
41.081	13.959
40.849	14.204
40.849	14.204
36.332	14.538
36.332	14.538
31.601	15.452
28.835	16.396
28.835	16.396
27.636	16.69
26.686	16.852
26.686	16.861
25.506	20.213
25.506	20.213
25.327	21.454
25.327	22.184
23.796	22.184
23.796	23.534
23.427	25.306
23.427	25.306
20.118	28.059
18.888	28.059
16.909	28.059
15.382	29.736
14.791	29.736
12.214	30.862
12.214	32.038
12.152	32.038
12.152	35.559
10.416	35.559
10.11	38.146
9.466	39.298
9.011	39.298
8.2	41.207
8.2	41.207
7.774	42.754
7.774	43.379
6.817	43.857
6.817	44.336
5.947	44.359
5.5	44.359
5.368	46.456
5.368	46.456
5.058	48.358
4.978	48.358
4.978	48.59
3.989	48.59
3.989	48.866
3.279	49.973
2.91	51.699
2.91	51.699
2.803	51.836
2.316	51.836
2.316	52.116
1.521	52.116
1.521	52.328
0	52.328
0	52.603
0	52.621
0	52.621
0	56.386
0	58.634
0	59.686
0	59.686
0	59.686
0	59.862
2.67	61.847
2.67	61.847
2.768	64.421
2.768	64.421
2.872	65.295
2.872	65.295
3.582	69.34
4.094	69.34
4.094	69.612
4.586	69.612
4.586	71.475
6.518	71.475
6.519	71.618
7.641	71.618
7.641	71.627
7.641	71.627
7.641	71.701
7.808	71.701
7.895	74.298
7.895	76.335
7.972	76.335
8.079	77.275
8.159	77.971
9.121	80.241
9.893	80.435
9.893	81.302
12.9	82.147
12.9	82.275
17.111	84.15
17.111	85.769
17.734	85.769
18.163	87.121
19.456	88.142
20.027	88.142
20.818	88.375
22.432	88.375
23.205	270.542
23.205	271.148
23.906	271.467
23.906	271.467
25.188	272.107
25.188	272.107
26.975	277.116
26.975	277.116
28.753	279.538
28.765	279.538
28.765	288.994
36.298	288.994
36.565	291.354
40.871	291.354
40.871	292.111
41.662	292.111
44.189	296.403
44.189	296.403
44.757	300.007
46.313	300.007
46.313	304.884
50.035	305.229
51.431	305.229
51.431	306.262
52.688	306.262
53.4	306.8
53.4	306.8
54.121	307.785
56.193	307.951
56.193	308.371
56.502	308.371
69.405	313.857
74.485	323.285
75.552	323.285
79.767	323.285
79.767	340.797
85.159	340.853
277.917	341.073
277.917	341.616
289.413	344.821

## Sheet: Figure 6k
Sox2 Slit2/3 KD Cell Roundnesss
Control	siRNA Slit2/3 1	siRNA Slit2/3 2
0.3914	0.480834	0.505653
0.419257	0.533218	0.504364
0.439679	0.628832	0.56998
