# Supplementary material for: N-cadherin directs the collective Schwann cell migration required for nerve regeneration through Slit2/3-mediated contact inhibition of locomotion
Source: eLife. 2024 Apr 9;13:e88872. doi: 10.7554/eLife.88872 (PMC11052573; doi:10.7554/eLife.88872)
Supplement: Figure 7—source data 1. [file elife-88872-fig7-data1.xlsx]

## Sheet: Figure 7d
PBS
Sample	0	24
A	14682.4	176111
B	18560	101492
C	31912.8	117383
E	51891.6	192057
F	32468.7	116797
G	23539.1	74189
H	4600.09	65075
I	57101.7	196215
J	32634.9	88715.9
Slit2
Sample	0	24
K	99123	140709
L	28302	87084
M	21142.8	22585.6
N	90374.8	112093
O	73400	148441
P	80887	247097
Q	24560.7	56624.4
R	30555.2	21881.7
S	38126.6	76941.5

## Sheet: Figure 7f
PBS
No. of SCs	No. of cords
59	31
60	31
79	32
54	41
rSlit2
No. of SCs	No. of cords
53	6
99	10
48	12
66	5

## Sheet: Figure 7g
PBS
No. of SCs	No. of clusters
59	5
60	8
79	5
54	5
rSlit2
No. of SCs	No. of clusters
53	21
99	41
48	24
66	28

## Sheet: Figure 7i
Control	rSlit2
0.395	0.545
0.459	0.738
0.489	0.576
0.364	0.612
0.215	0.679
0.395	0.885
0.358	0.721
0.392	0.833
0.281	0.754
0.407	0.814
0.425	0.693
0.664	0.665
0.482	0.725
0.499	0.709
0.378	0.874
0.578	0.627
0.703	0.799
0.252	0.5
0.715	0.584
0.702	0.745
0.553	0.698
0.502	0.631
0.54	0.561
0.437	0.577
0.502	0.583
0.558	0.787
0.502	0.676
0.683	0.674
0.501	0.706
0.569	0.733
0.49	0.561
0.571	0.509
0.501	0.62
0.502	0.736
0.558	0.647
0.591	0.622
0.532	0.558
0.581	0.678
0.595	0.56
0.466	0.689
0.56	0.57
0.591	0.741
0.598	0.702
0.437	0.502
0.515	0.554
0.459	0.624
0.483	0.57
0.507	0.572
0.754	0.575
0.575	0.759
0.575	0.668
0.467	0.536
0.451	0.499
0.403	0.621
0.675	0.587
0.603	0.719
0.426	0.574
0.515	0.663
0.458	0.511
0.516	0.55
0.515	0.84
0.458	0.798
0.45	0.591
0.456	0.501
	0.609

## Sheet: Figure 7j
PBS	rSlit2
15.886	62.535
0	44.714
6.047	-2.836
5.512	18.435
8.701	4.544
11.991	-33.891
23.421	2.831
10.22	-15.905
4.409	-2.545
-0.558	-6.213
-8.13	21.845
-12.16	-20.944
-7.507	-11.065
1.408	-10.387
11.933	-6.464
2.361	40.03
9.043	53.461
1.425	-1.986
10.658	6.34
10.847	47.836
1.245	-56.186
16.229	-7.696
-3.662	-47.131
-7.49	-57.095
14.132	-6.655
13.106	9.52
9.365	62.226
-8.318	47.974
-3.476	-12.78
-24.078	-10.494
4.728	-3.853
0.925	12.78
2.61	10.494
-0.102	3.853
2.756	-27.773
-0.871	-28.073
1.744	-61.839
4.202	-10.914
5.186	-12.704
7.454	-38.264
16.35

## Sheet: Figure 7k
PBS	rSlit2
22.619	97.223
11.31	17.498
17.452	70.258
27.995	43.659
10.042	13.152
30.756	29.322
46.974	50.948
52.844	25.256
64.776	22.869
77.082	48.991
65.242	42.424
26.475	10.818
11.241	13.683
70.292	45.012
69.775	24.896
2.71	2.137
13.693	54.055
5.572	20.228
11.003	12.909
5.254	11.923
22.619	18.714
1.819	55.927
7.973	52.378
4.516	4.985
0.73	39.975
0.498	11.131
3.329	37.976
5.889	72.086
11.949	89.549
21.639	35.924
8.934	32.929
46.054	25.467
25.75	18.312
1.614	18.822
11.773	39.672
12.81	7.387
2.864	19.892
13.742	23.064
1.879	26.798
12.386	40.379
4.962	25.348
5.477	5.08
23.879	56.025
32.699	48.039
11.56	14.35
12.225	16.197
1.753	4.97
3.591	16.196
1.715	25.261
2.003	30.108
0.562	34.358
1.131	23.267
2.917	25.193
0	42.841
0.412	11.889
30.964	10.62
5.572	64.44
1.614	52.595
35.538	44.534
2.463	49.399
12.216	49.399
4.88	79.919
23.554	19.855
13.449	77.905
15.396	1.123
2.545	46.123
13.885	1.909
3.945	55.176
0.909	4.399
7.374	52.734
2.521	10.923
0	85.668
26.213	79.077
10.702	36.363
12.53
8.018
4.574
4.399
35.258
1.953
23.2
