# Supplementary figures and images for: N-cadherin directs the collective Schwann cell migration required for nerve regeneration through Slit2/3-mediated contact inhibition of locomotion
Source: eLife journal article supplement (doi:10.7554/elife.88872), 2024-04-03

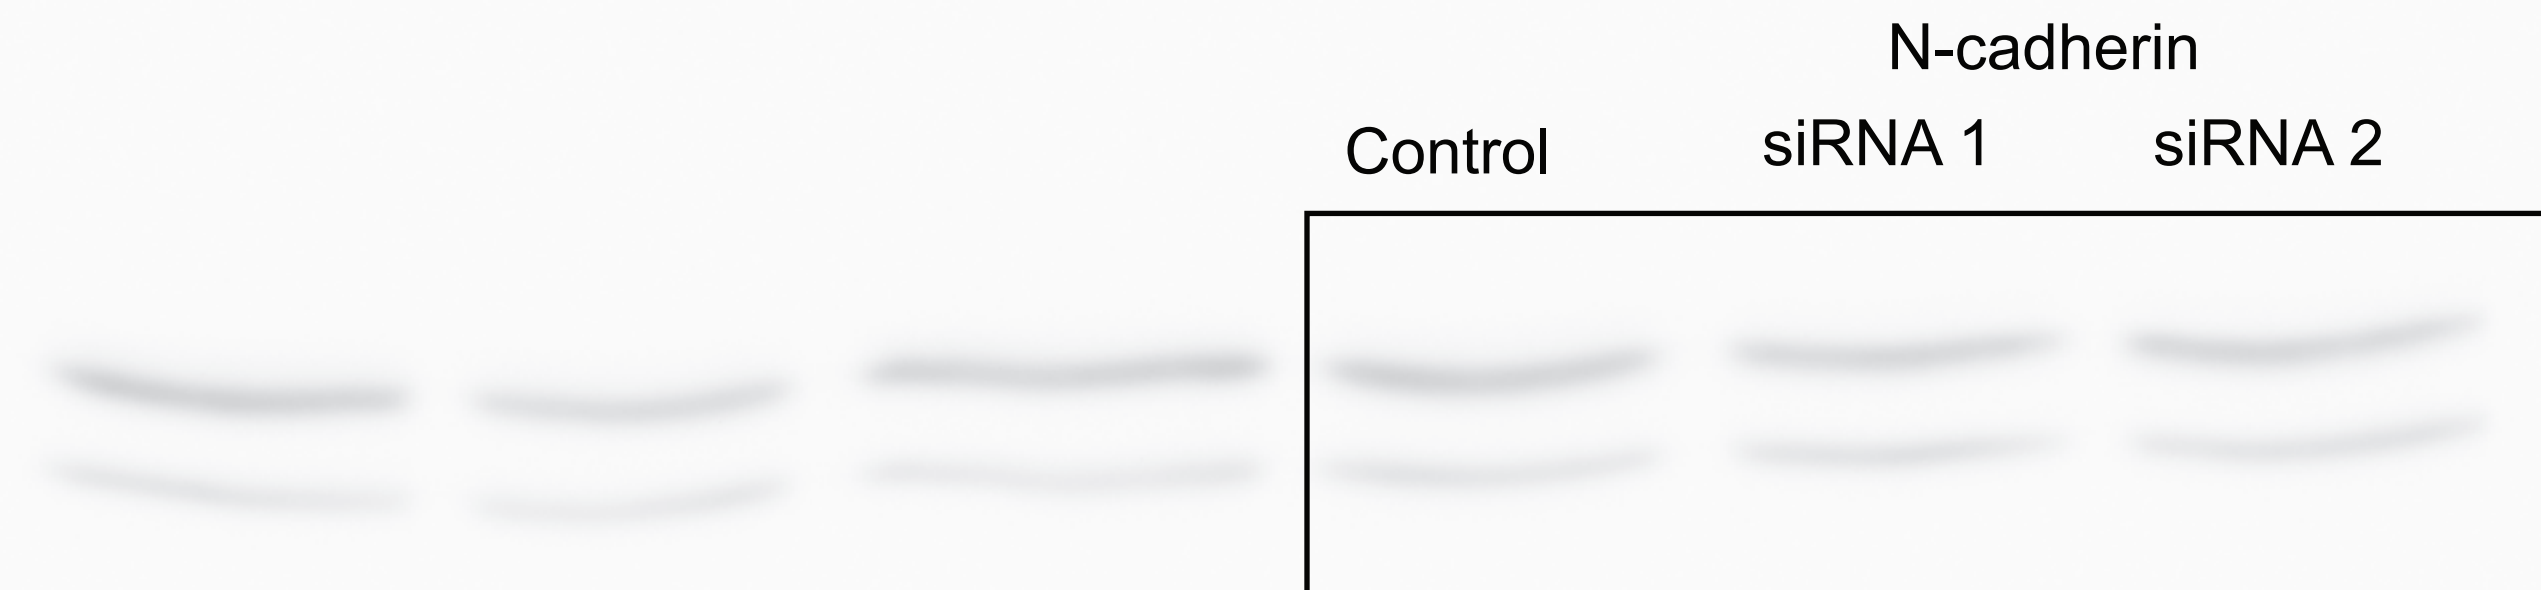

Supplement: fig1-figsupp1-data4 [file elife-88872-fig1-figsupp1-data4-v2.zip]

— — — — — — — — — —

alpha-catenin

Control

siRNA 1

siRNA 2

siRNA 1+2

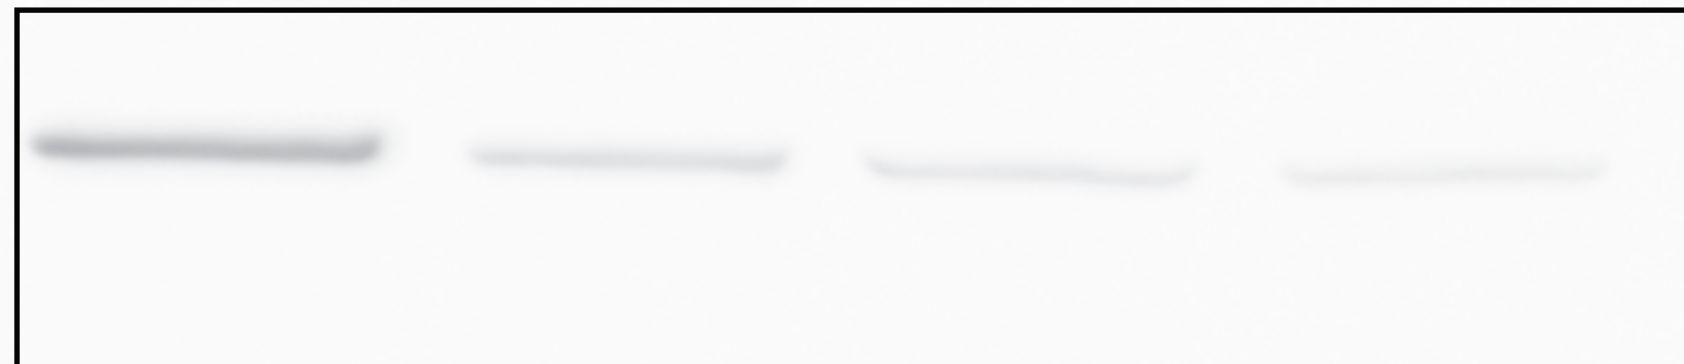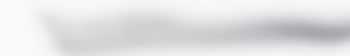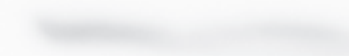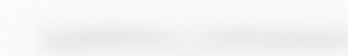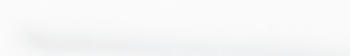

Supplement: fig2-figsupp1-data1 [file elife-88872-fig2-figsupp1-data1-v2.zip]

p120-catenin

| Control | siRNA 1 | siRNA 2 |
|---------|---------|---------|
|---------|---------|---------|

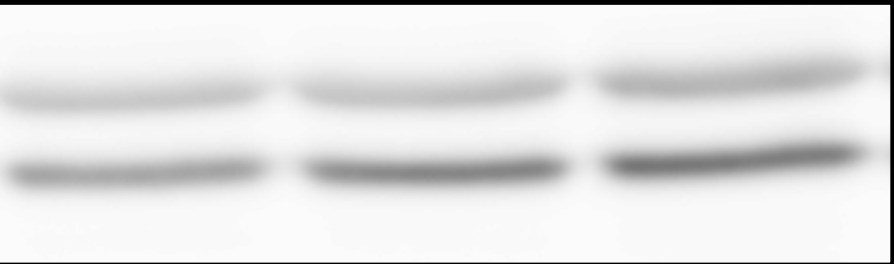

Supplement: fig2-figsupp1-data10 [file elife-88872-fig2-figsupp1-data10-v2.zip]

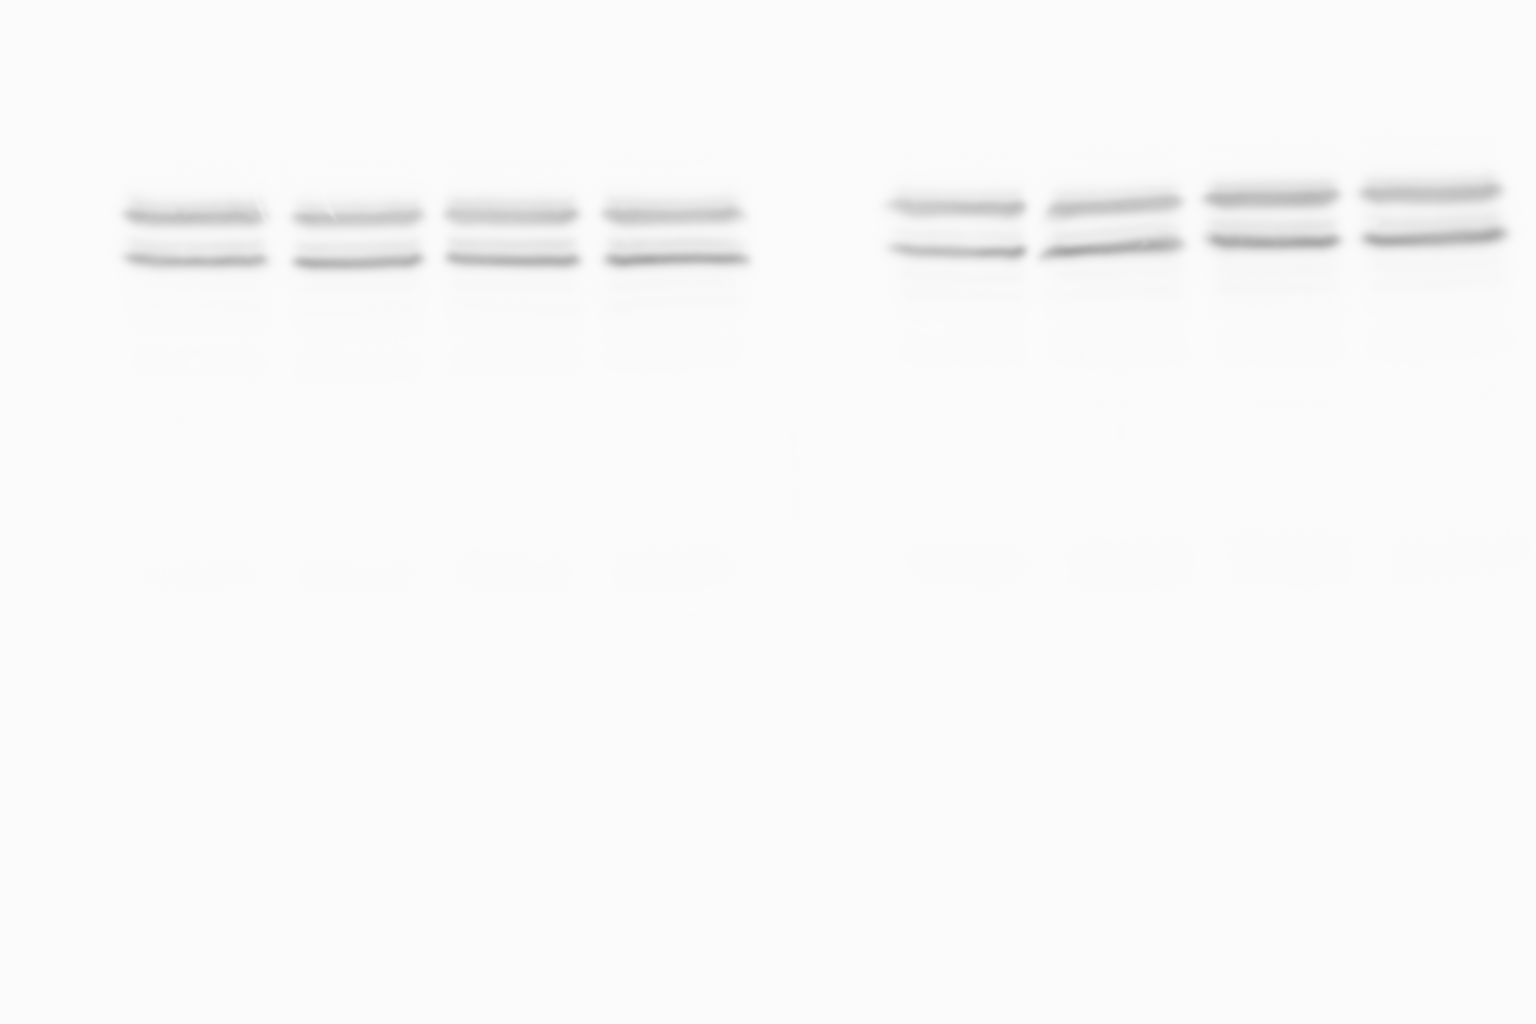

Supplement: fig2-figsupp1-data3 [file elife-88872-fig2-figsupp1-data3-v2.zip]

alpha-catenin

Control

siRNA 1

siRNA 2

siRNA 1+2

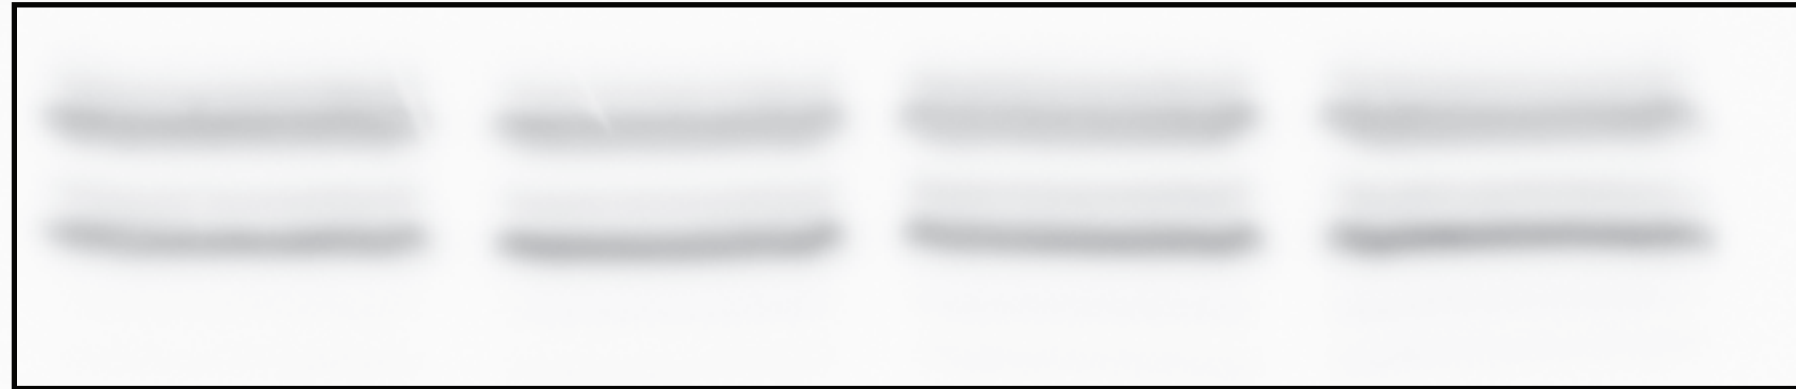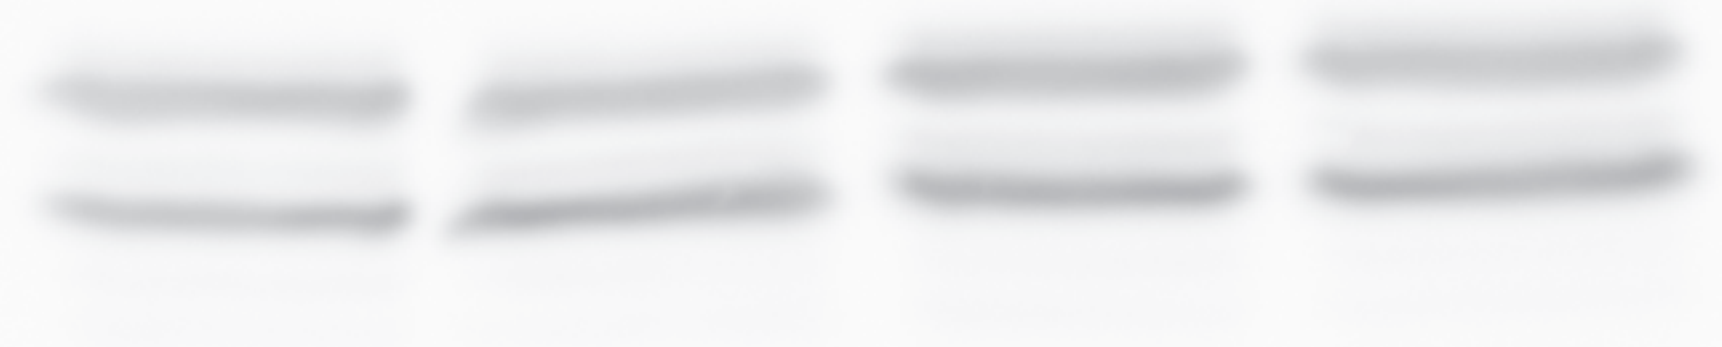

Supplement: fig2-figsupp1-data4 [file elife-88872-fig2-figsupp1-data4-v2.zip]

p120-catenin

Control

siRNA 1

siRNA 2

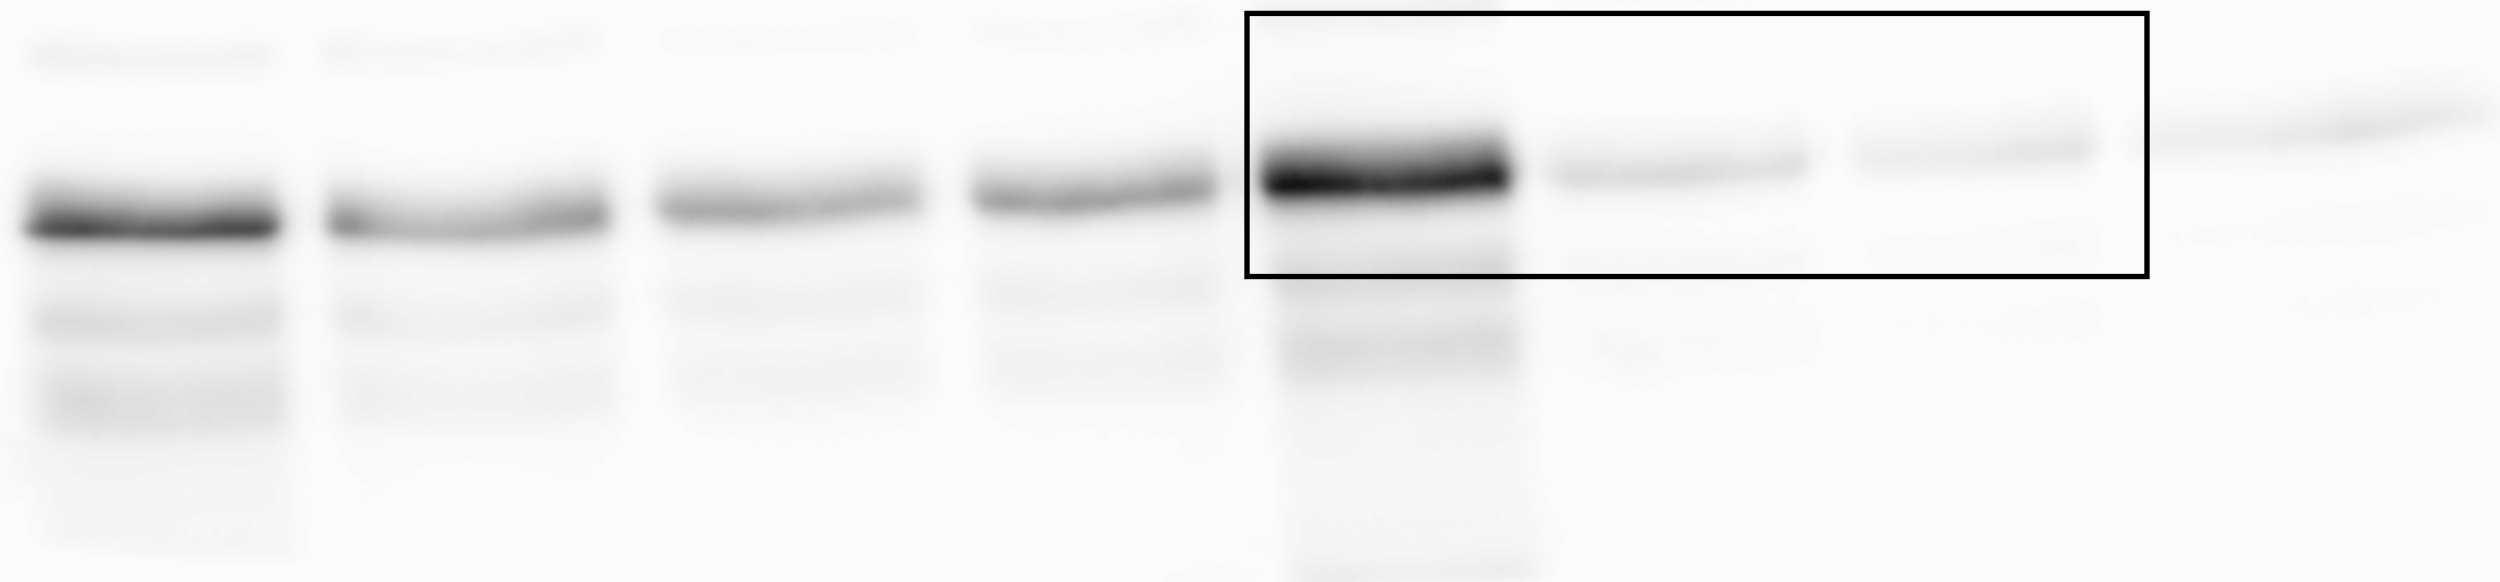

Supplement: fig2-figsupp1-data6 [file elife-88872-fig2-figsupp1-data6-v2.zip]

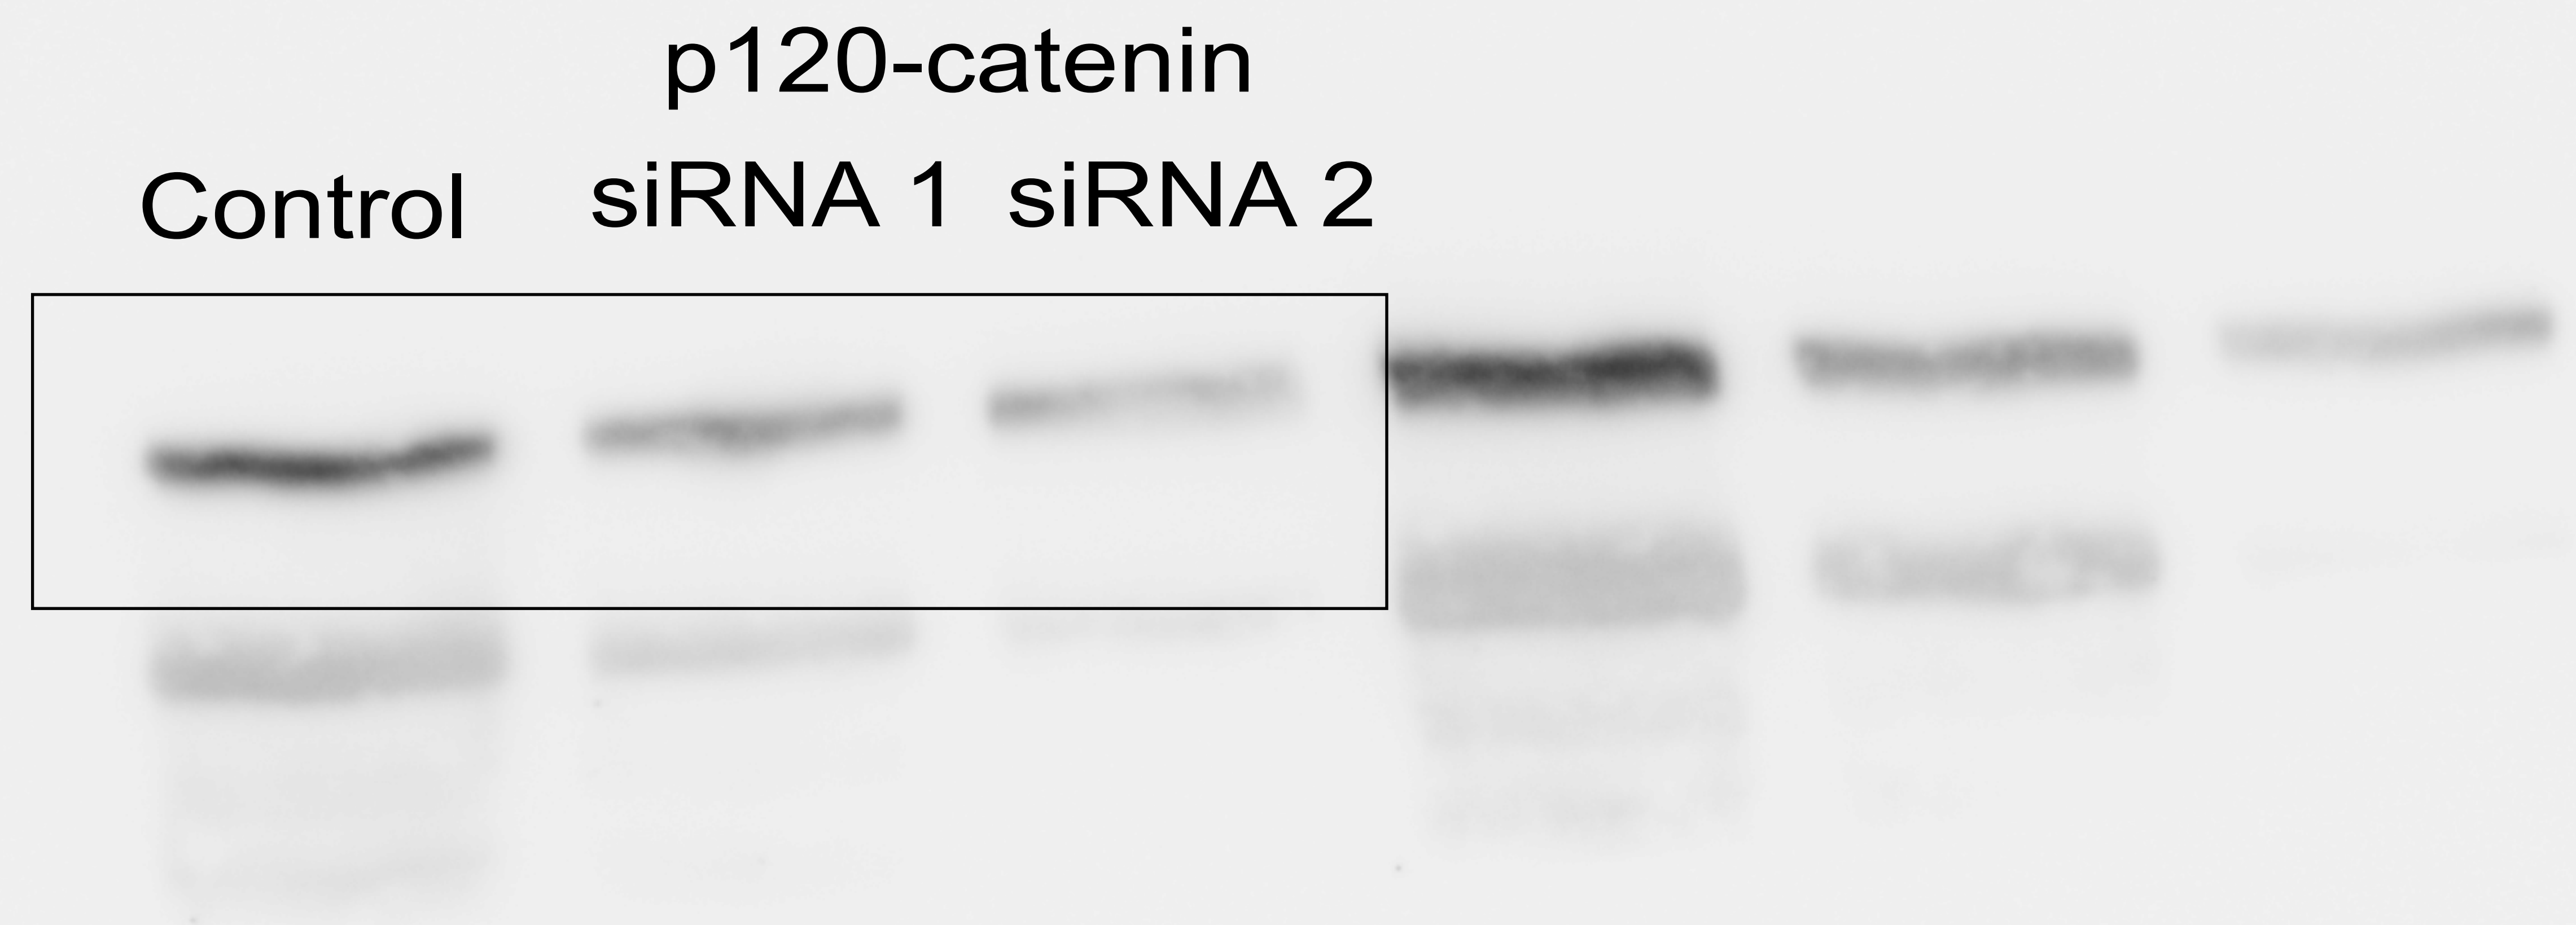

Supplement: fig2-figsupp1-data8 [file elife-88872-fig2-figsupp1-data8-v2.zip]

SiRNA N-CAD

Control      Si1      FL      ICD      ECD

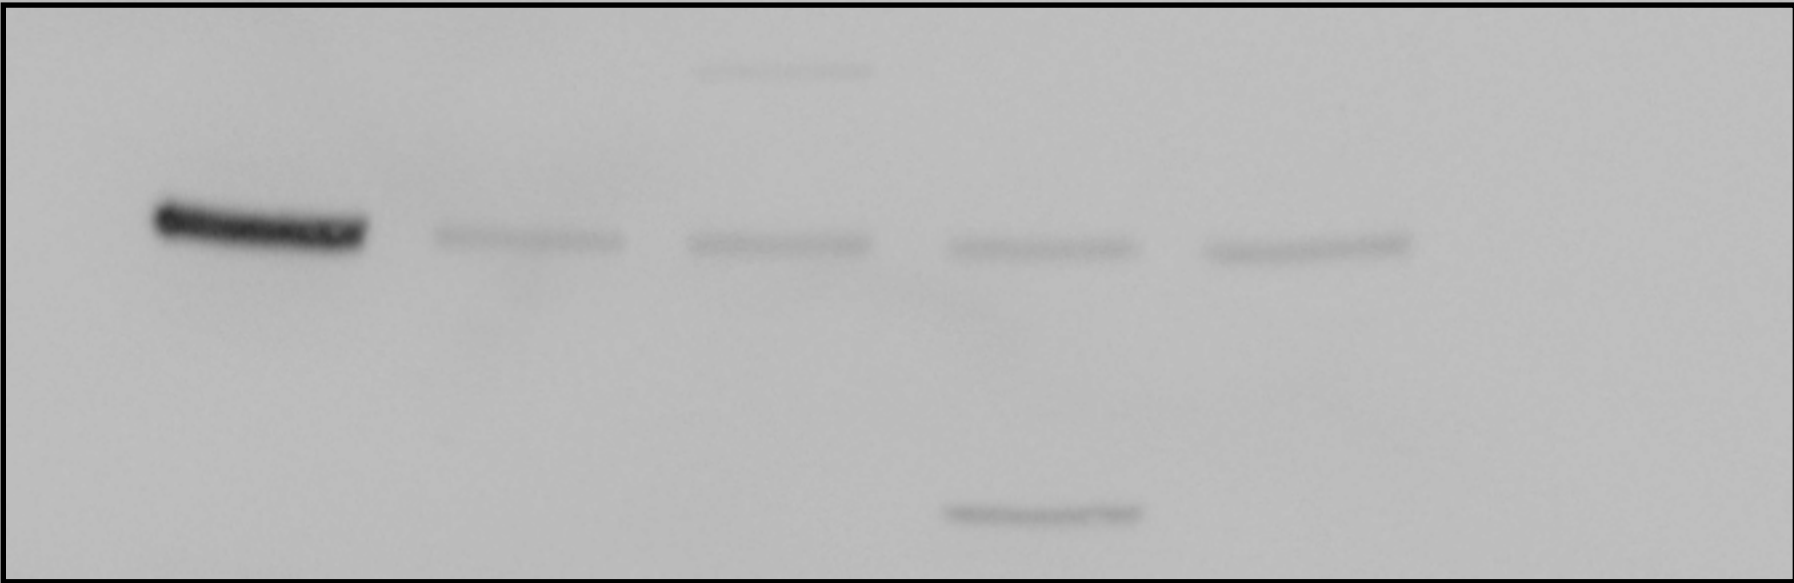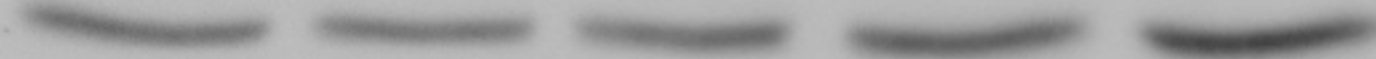

Supplement: fig3-data2 [file elife-88872-fig3-data2-v2.zip]

SiRNA N-CAD

Control

Si1

FL

ICD

ECD

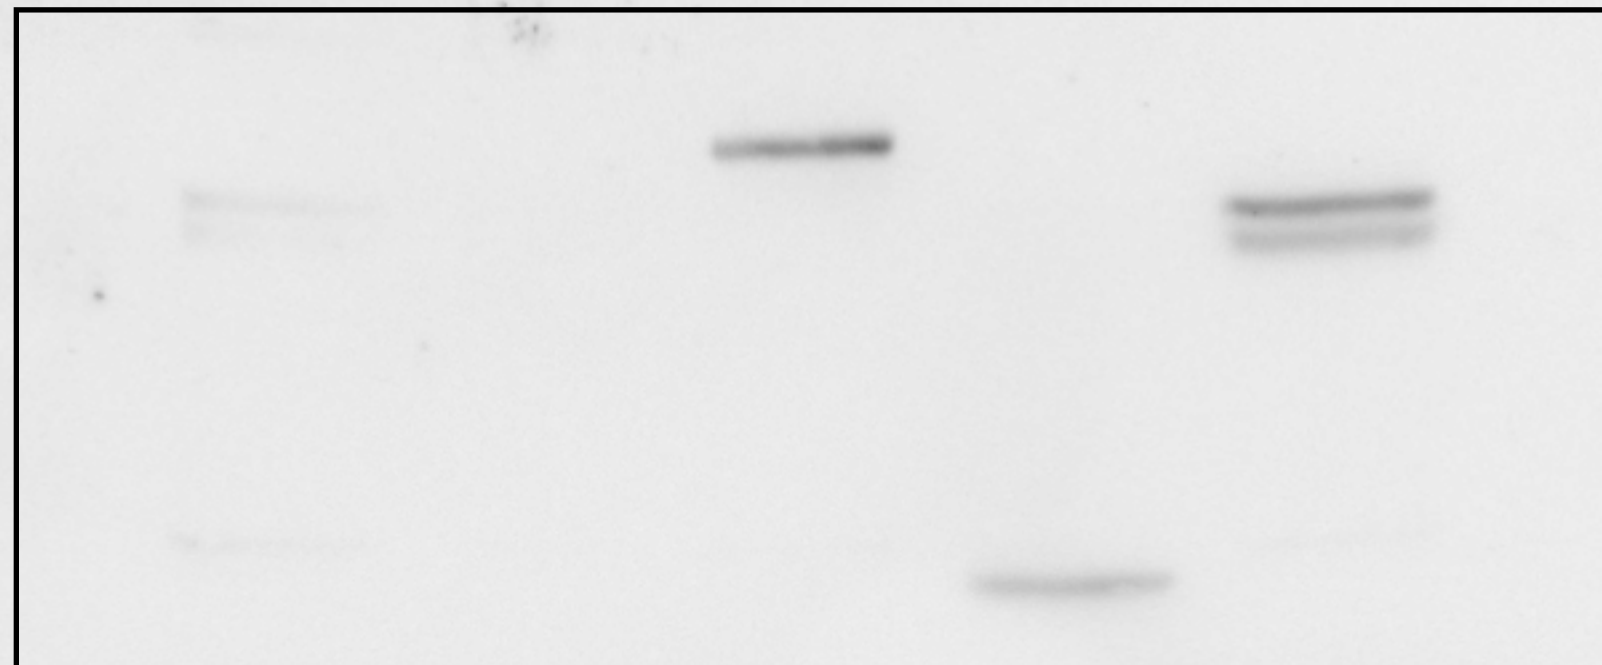

Supplement: fig3-data4 [file elife-88872-fig3-data4-v2.zip]

SiRNA N-CAD

Control

Si1

FL

ICD

ECD

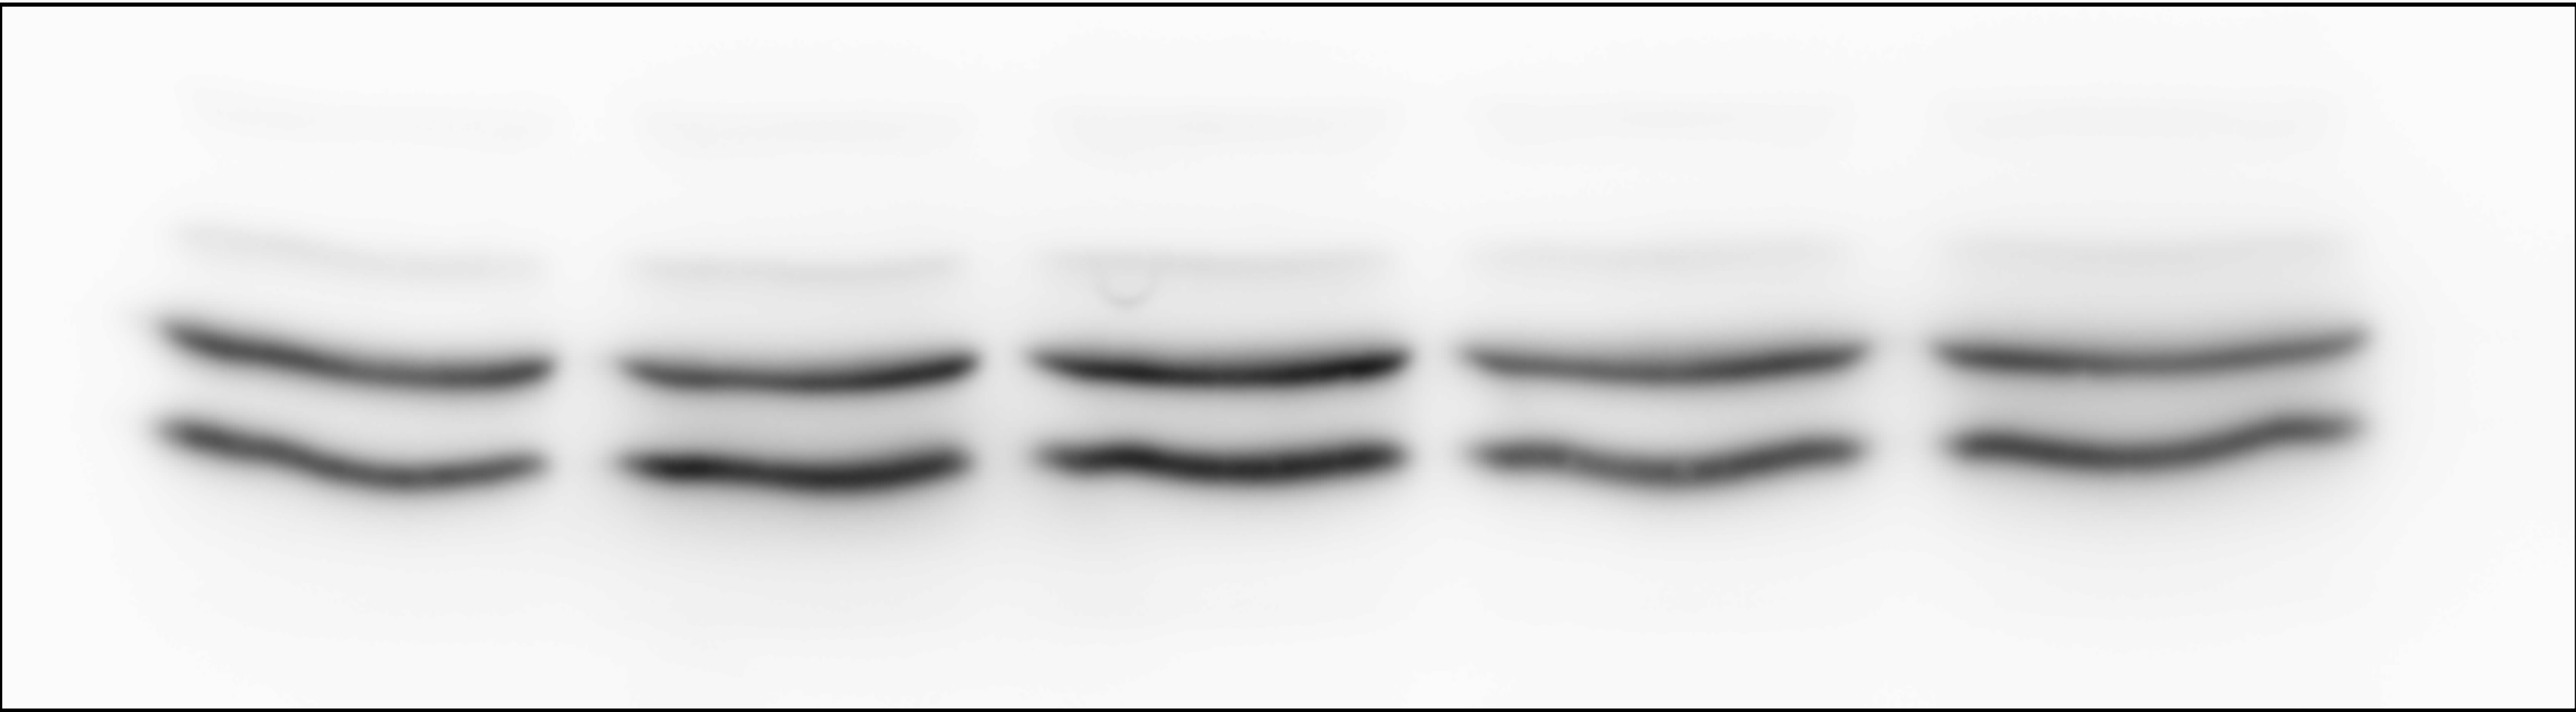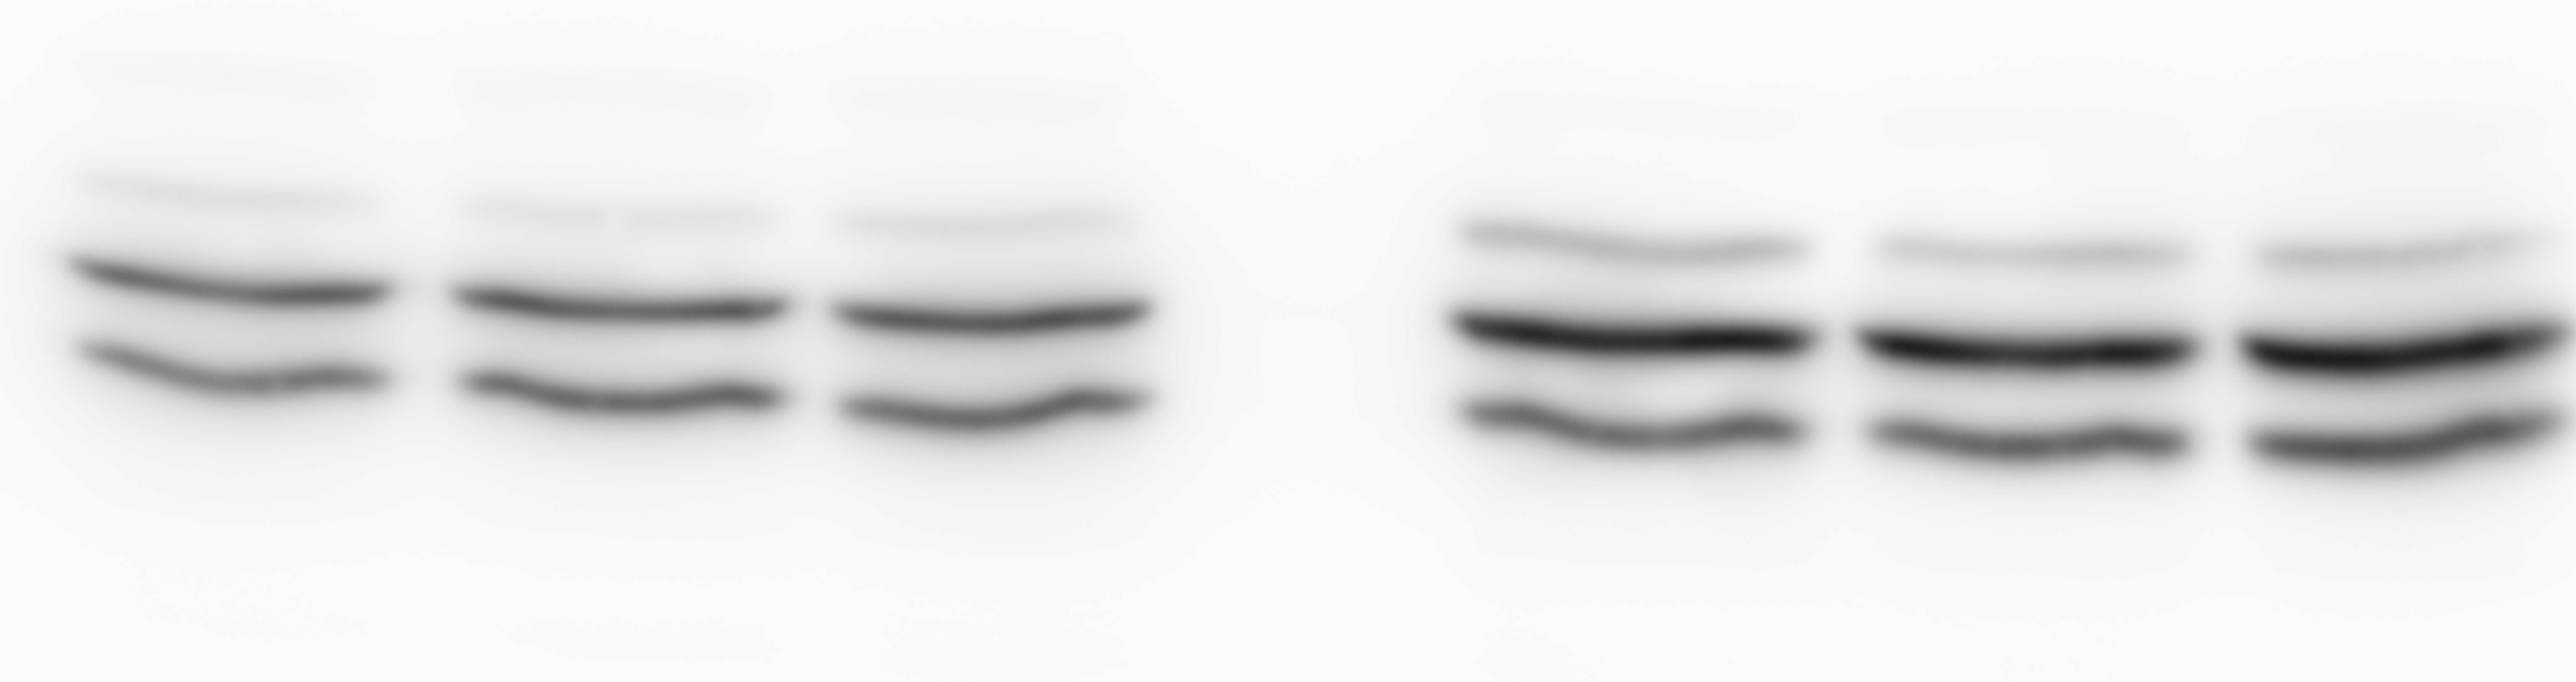

Supplement: fig3-data6 [file elife-88872-fig3-data6-v2.zip]

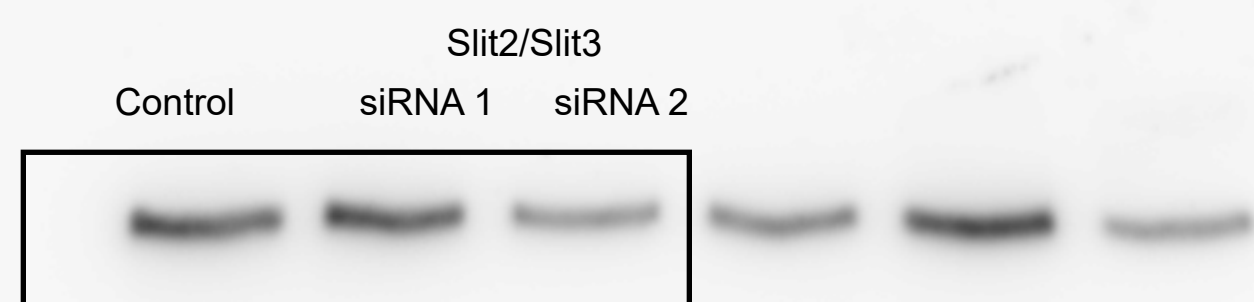

Supplement: fig4-figsupp1-data10 [file elife-88872-fig4-figsupp1-data10-v2.zip]

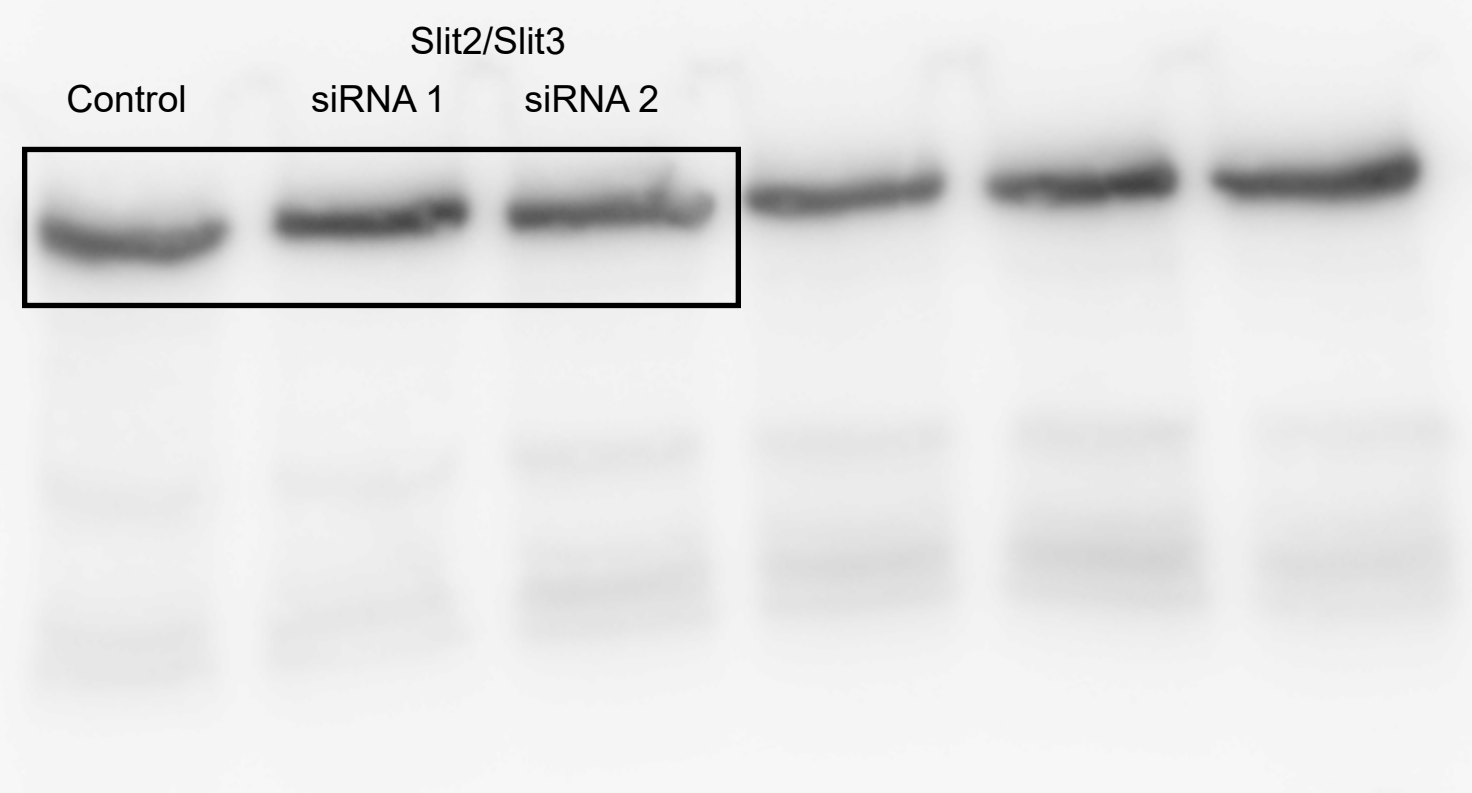

Supplement: fig4-figsupp1-data12 [file elife-88872-fig4-figsupp1-data12-v2.zip]

Robo 1

Robo 2

Robo 3

Slit1

Slit2

Slit3

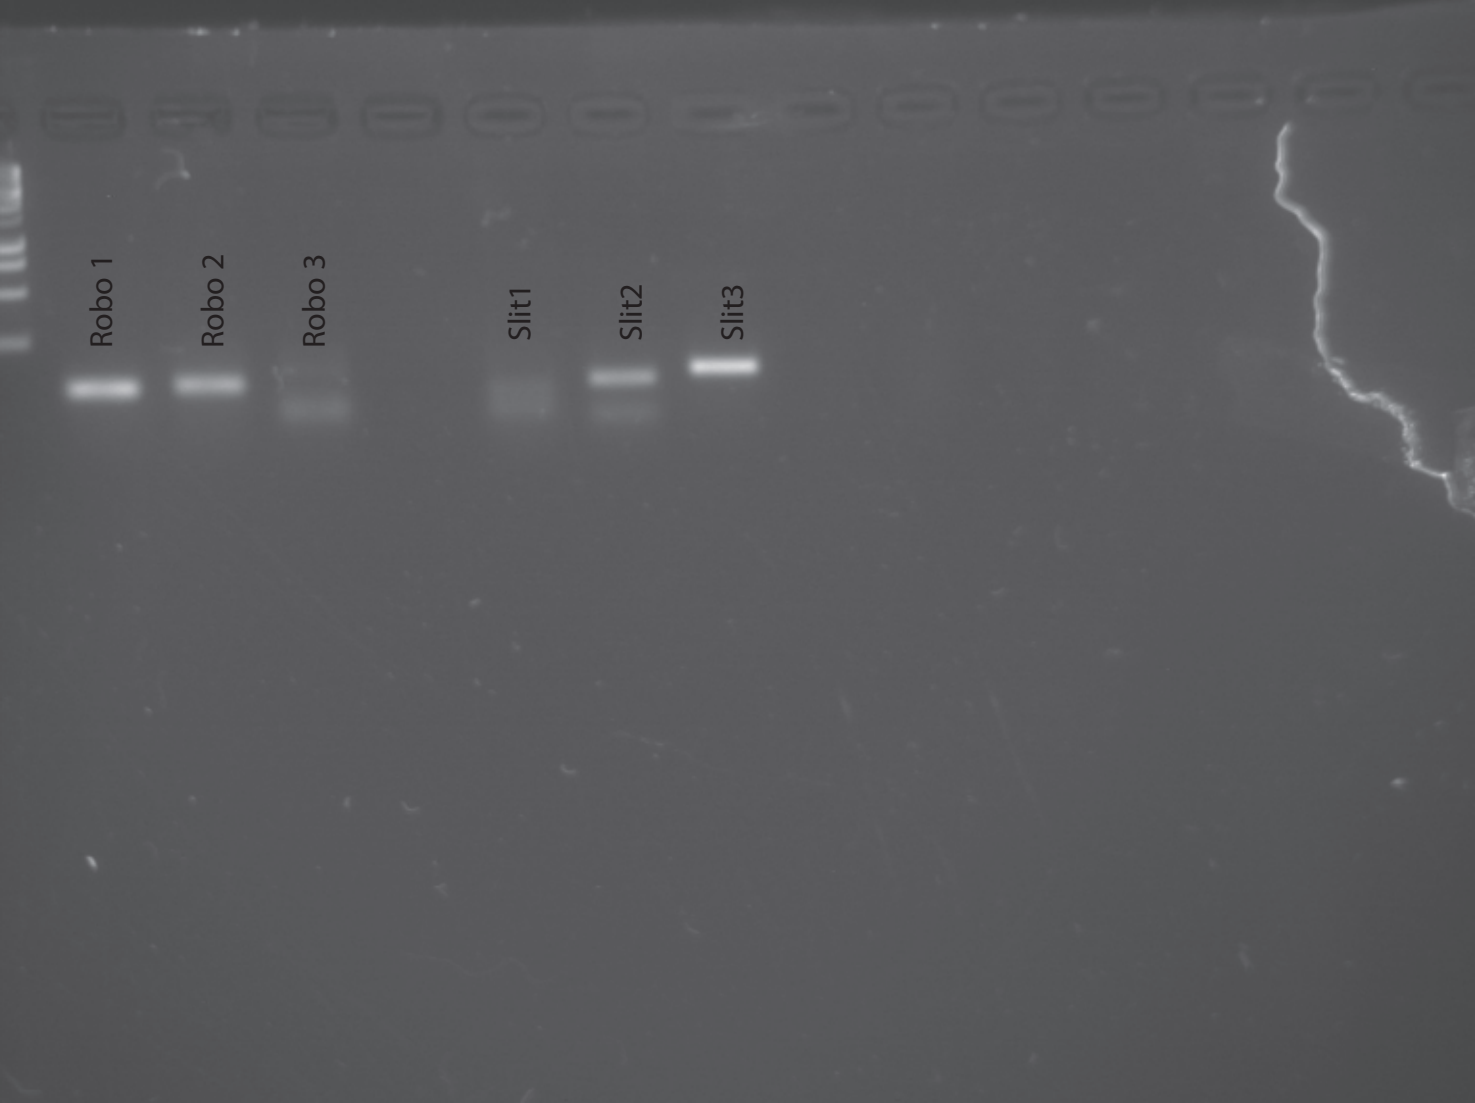

Supplement: fig4-figsupp1-data2 [file elife-88872-fig4-figsupp1-data2-v2.zip]

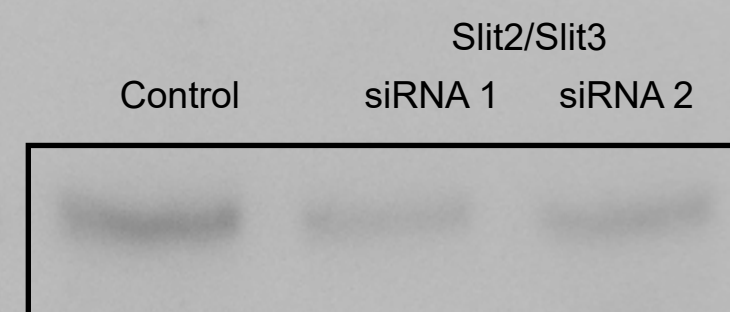

Supplement: fig4-figsupp1-data6 [file elife-88872-fig4-figsupp1-data6-v2.zip]

Slit2/Slit3

Control

siRNA 1

siRNA 2

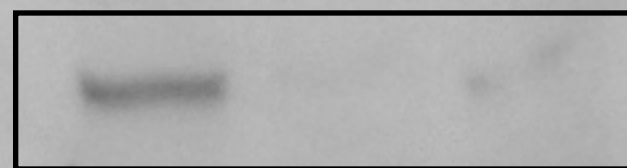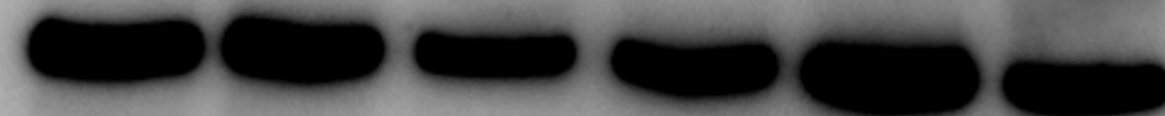

Supplement: fig4-figsupp1-data8 [file elife-88872-fig4-figsupp1-data8-v2.zip]

Slit2 antibody

| <u>total input</u> |   | IP: |        | IP: |        |               |
|--------------------|---|-----|--------|-----|--------|---------------|
| +                  | - | IgG | tomato | IgG | tomato |               |
| +                  | - | +   | +      | -   | -      | Tomato        |
| -                  | + | -   | -      | +   | +      | N-Cad::Tomato |
| +                  | + | +   | +      | +   | +      | Slit-2::Myc   |

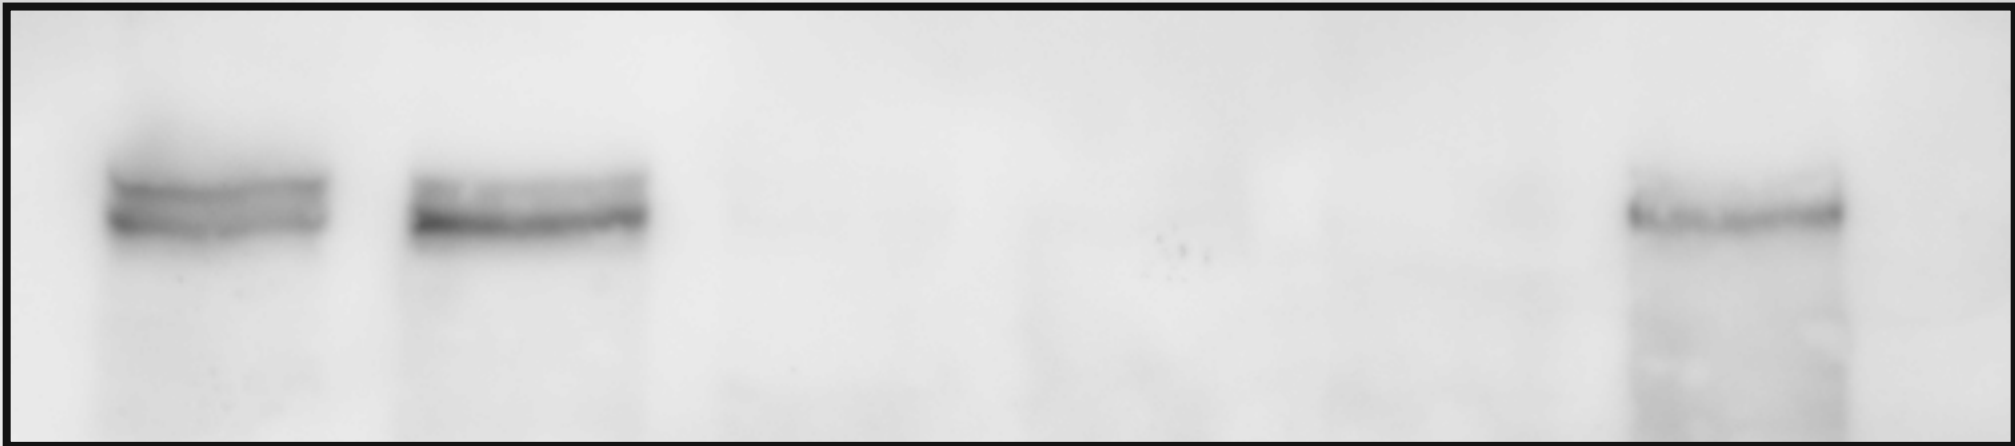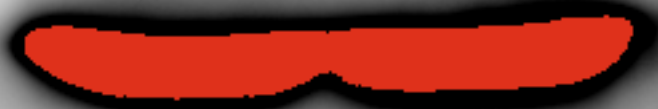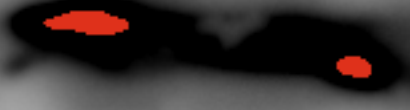

Supplement: fig5-figsupp1-data10 [file elife-88872-fig5-figsupp1-data10-v2.zip]

tomato antibody

| <u>total input</u> |   | IgG | IP:    |   | IgG | IP:    |               |
|--------------------|---|-----|--------|---|-----|--------|---------------|
| +                  | - |     | tomato |   |     | tomato |               |
| +                  | - | +   | +      | - | -   | -      | Tomato        |
| -                  | + | -   | -      | + | +   | +      | N-Cad::Tomato |
| +                  | + | +   | +      | + | +   | +      | Slit-2::Myc   |

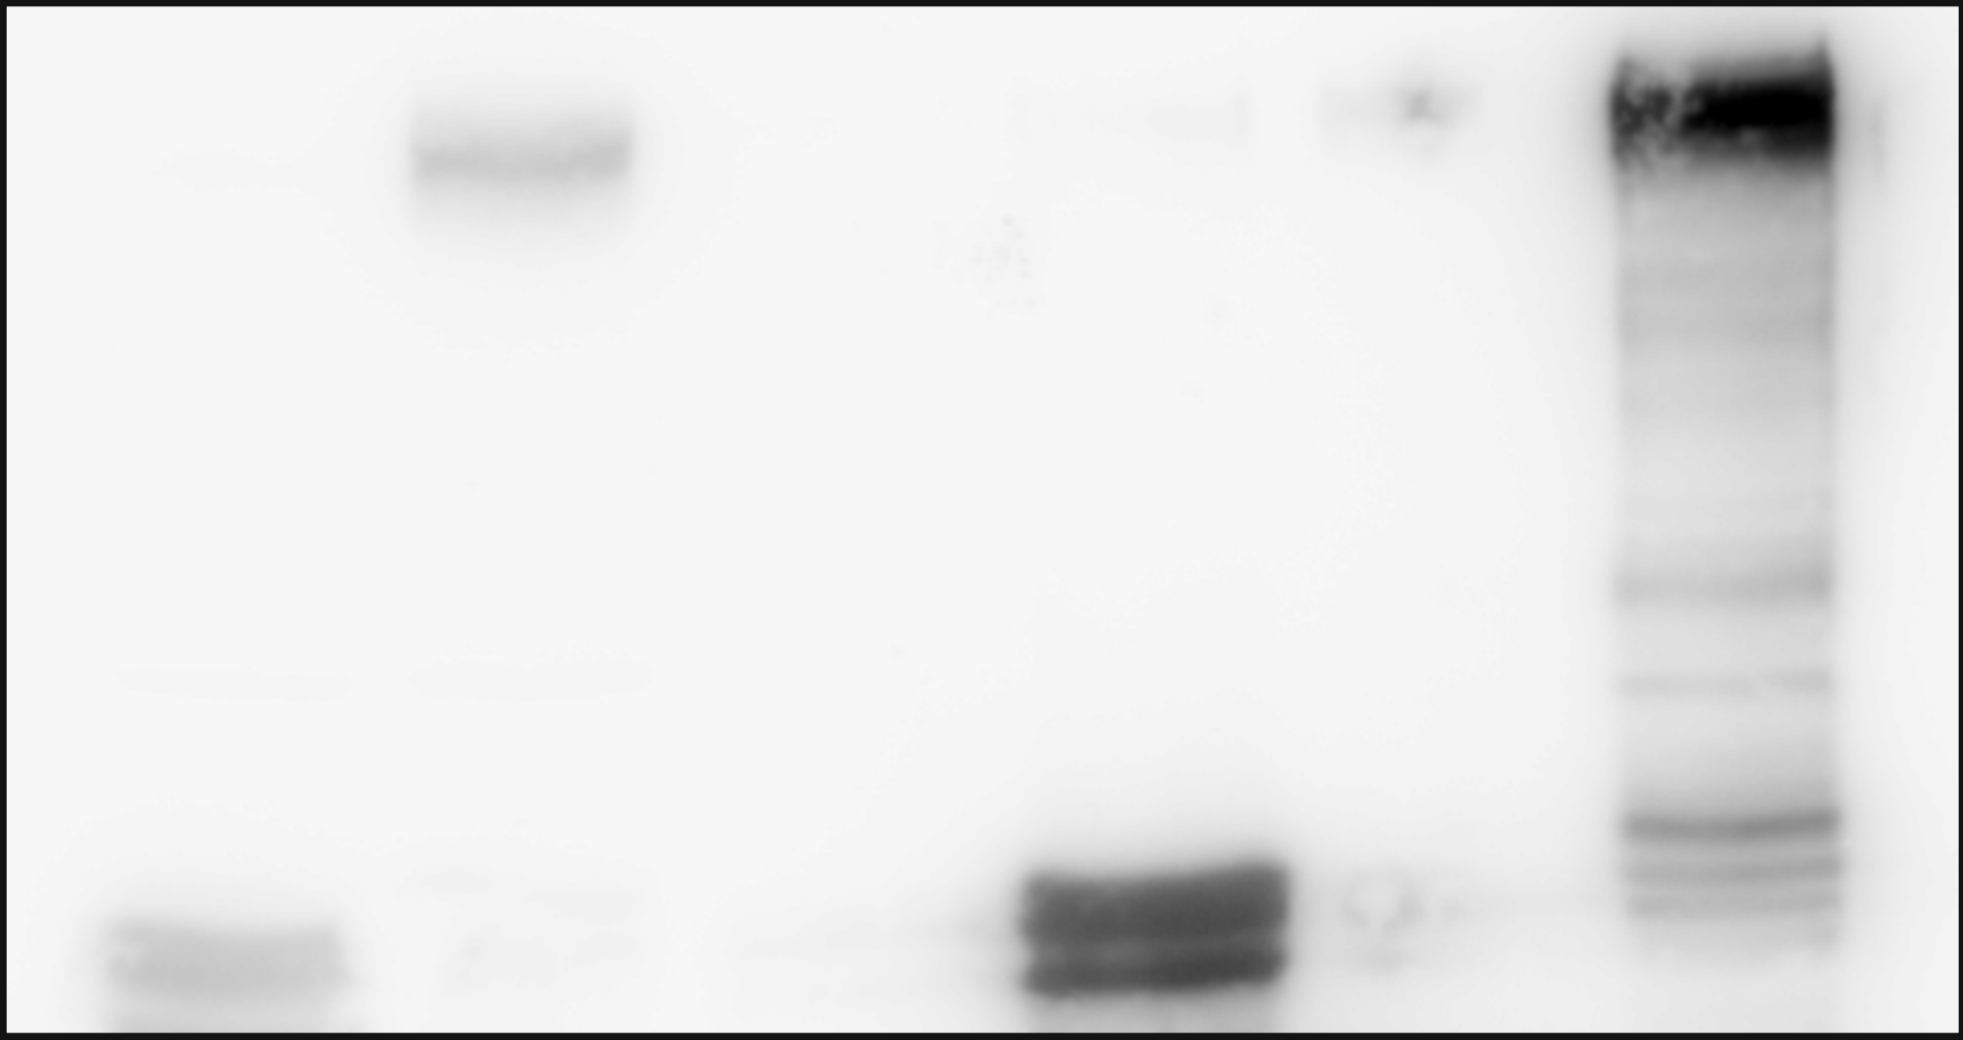

Supplement: fig5-figsupp1-data14 [file elife-88872-fig5-figsupp1-data14-v2.zip]

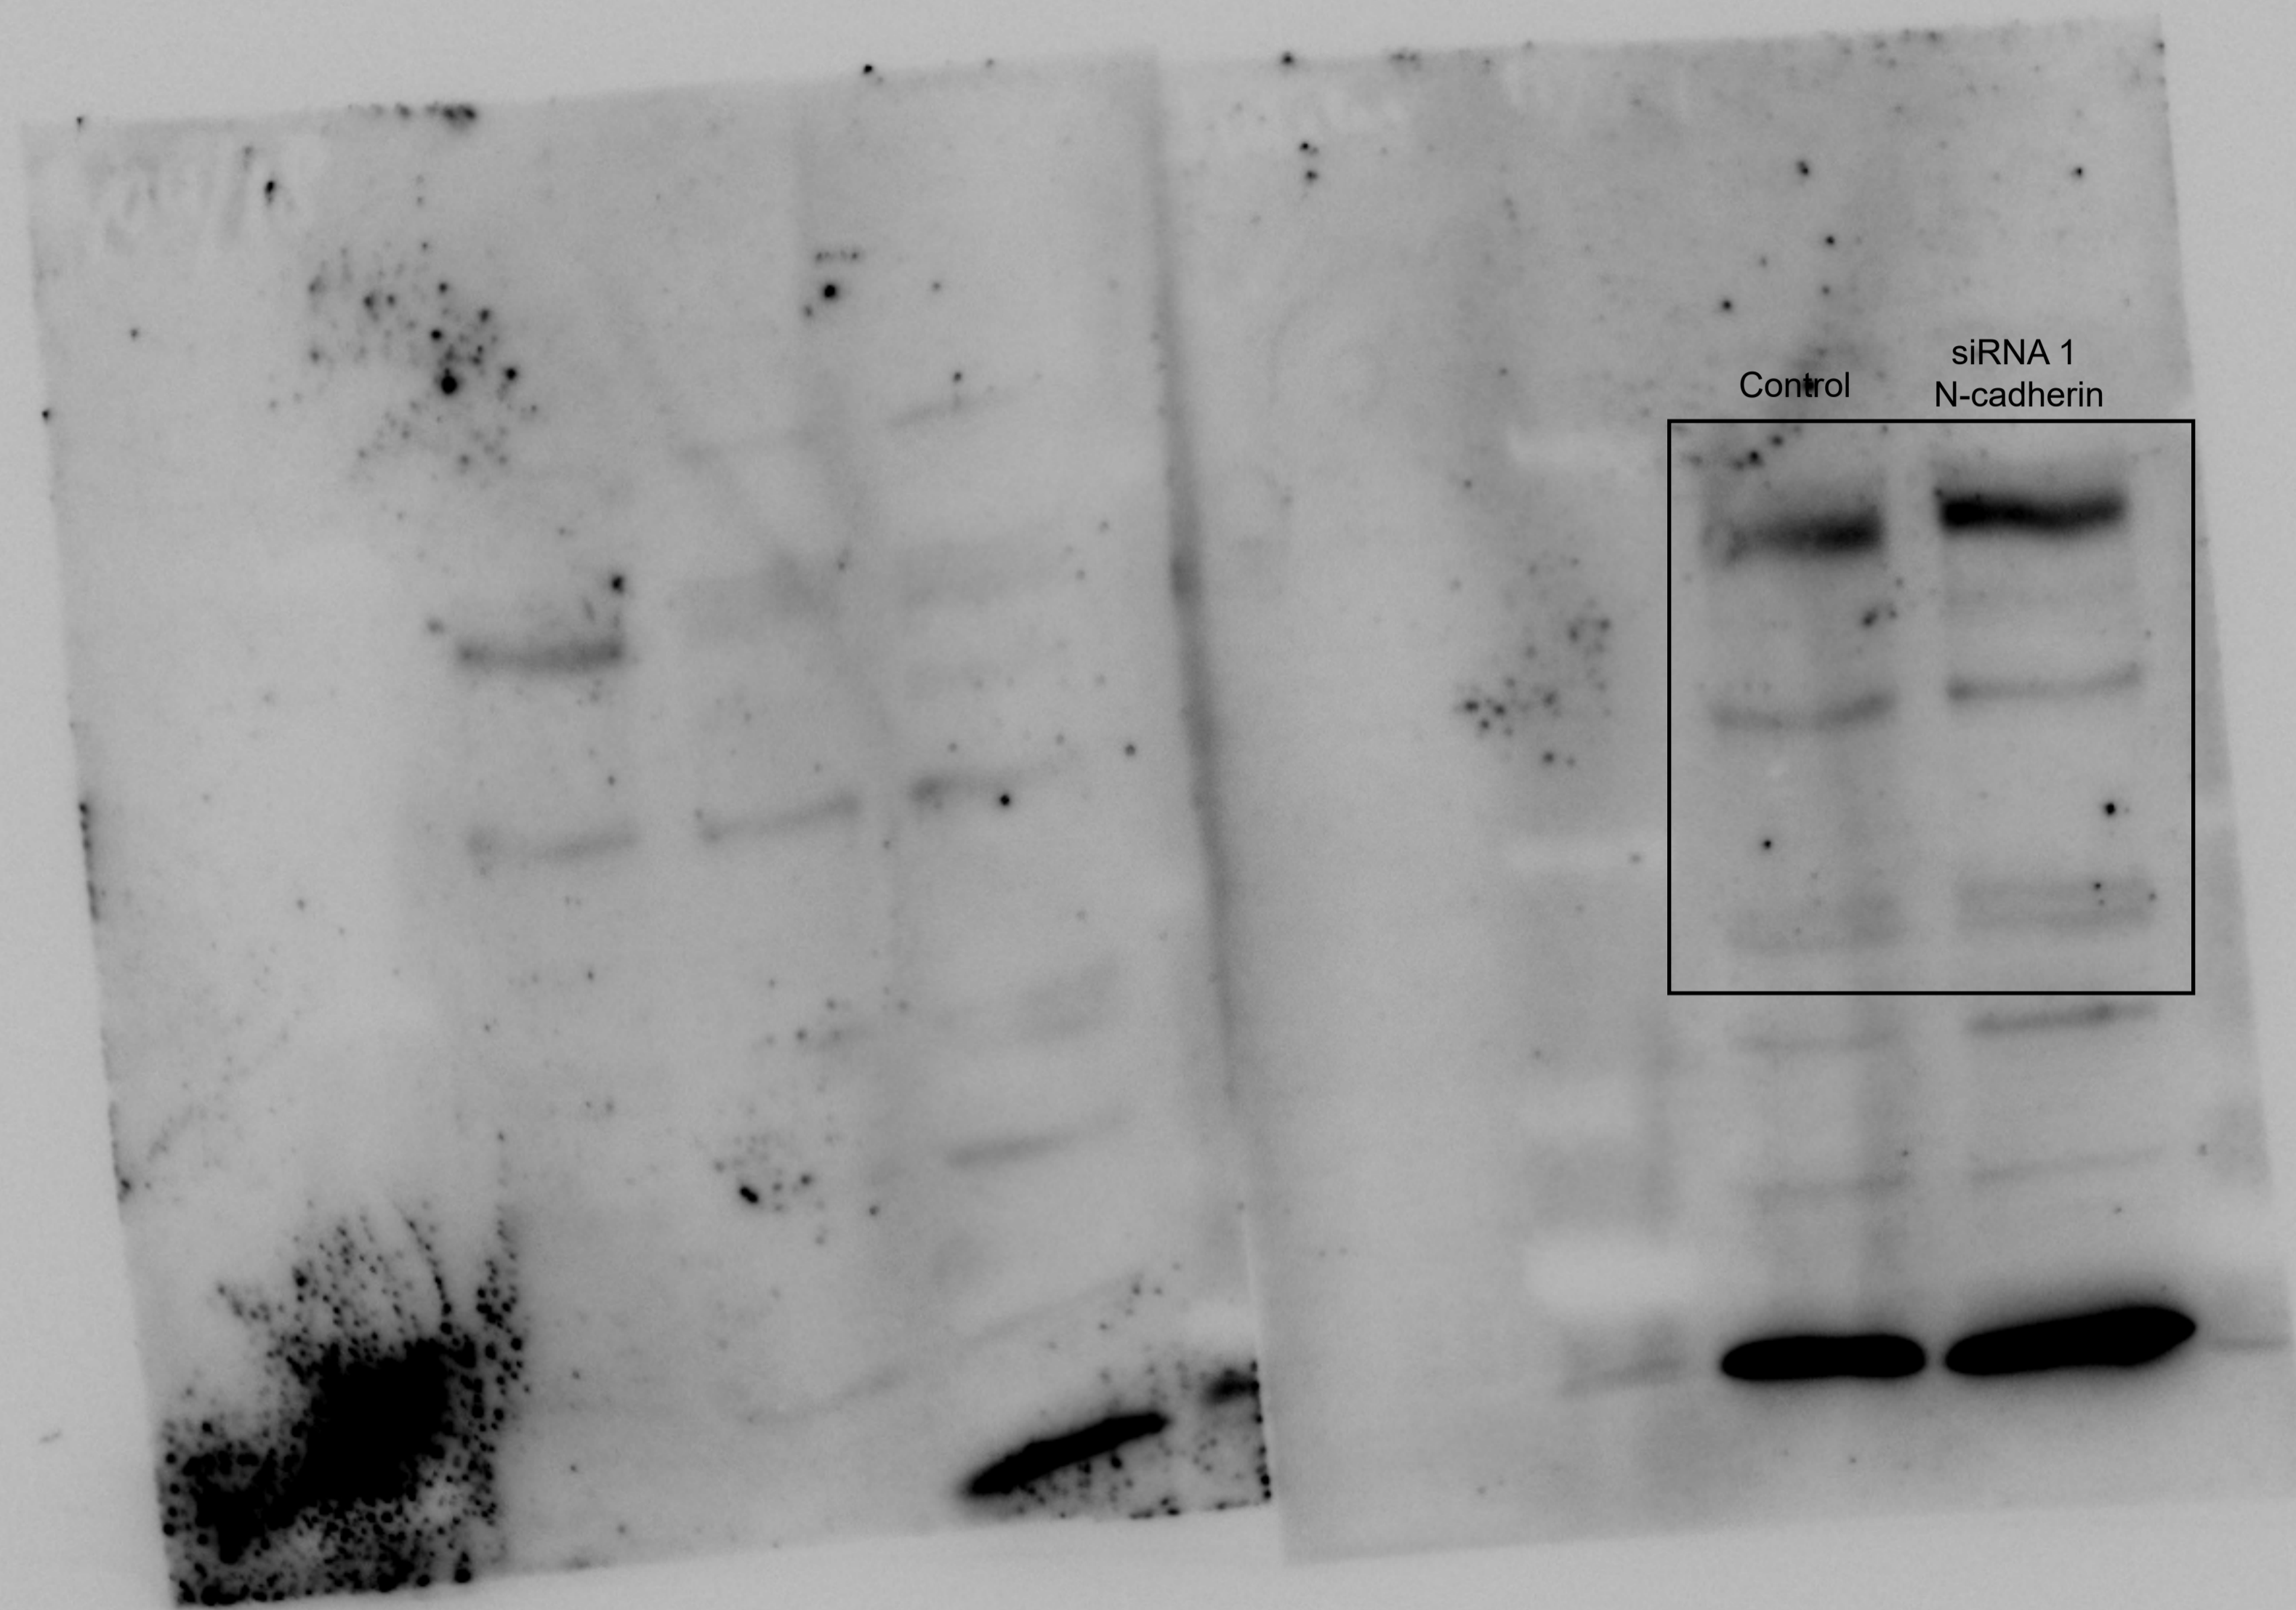

Supplement: fig5-figsupp1-data4 [file elife-88872-fig5-figsupp1-data4-v2.zip]

Control

siRNA 1  
N-cadherin

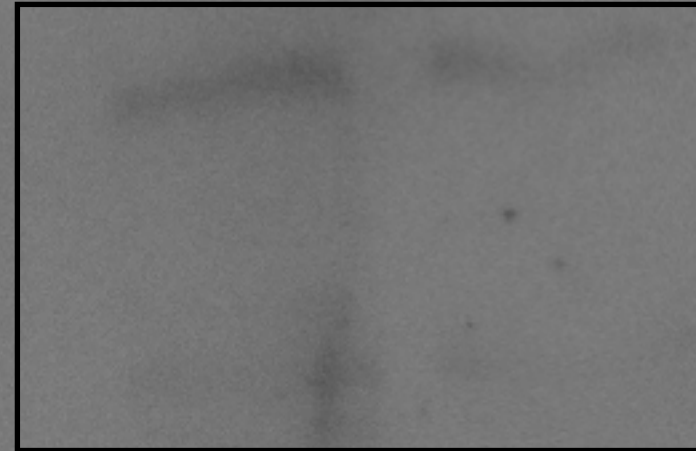

Supplement: fig5-figsupp1-data6 [file elife-88872-fig5-figsupp1-data6-v2.zip]

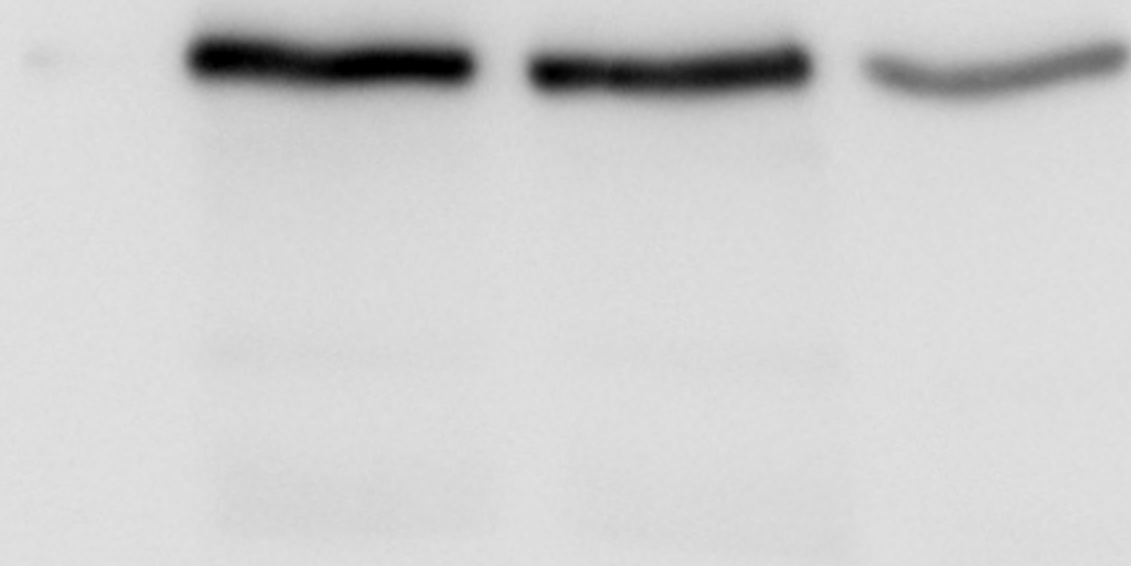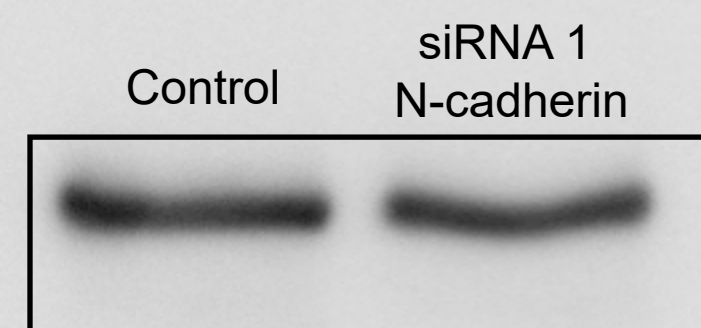

Supplement: fig5-figsupp1-data8 [file elife-88872-fig5-figsupp1-data8-v2.zip]

Gel flipped in paper

pTUNER  
Sox2

+

-

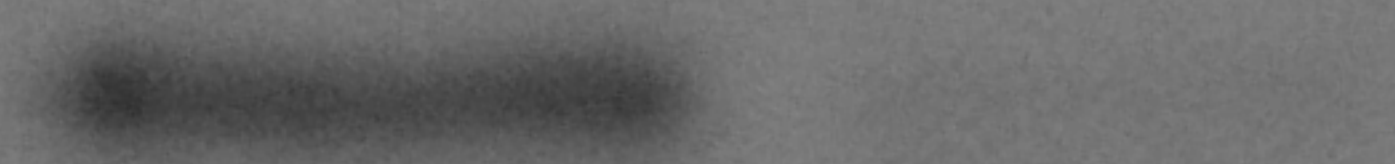

pTUNER  
Empty

+

-

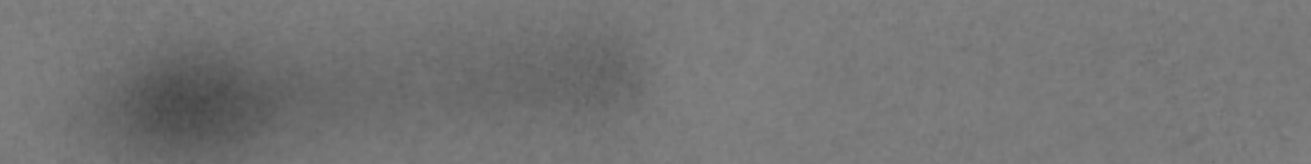

Supplement: fig6-figsupp1-data4 [file elife-88872-fig6-figsupp1-data4-v2.zip]
